# Supplementary material for: Identification and characterisation of endogenous Avian Leukosis Virus subgroup E (ALVE) insertions in chicken whole genome sequencing data
Source: Mob DNA. 2020 Jun 30;11:22. doi: 10.1186/s13100-020-00216-w (PMC7325683; doi:10.1186/s13100-020-00216-w)
Supplement: Supplementary file 2 — Additional file 2: AF2. Hy-Line ALVE sequences. This file contains all fifteen successfully sequenced ALVEs from the eight Hy-Line elite layer lines. FASTA headers include sequence genomic orientation, observed length and new GenBank accession numbers where applicable. [file 13100_2020_216_MOESM2_ESM.fa]

>ALVE1_negative_7530
TGTAGTCAAATAGAGCCAGAGGCAACTTGAAAAGTCTAAAGACCAAATAAGGAAAAAGCAAGACATTCCATATGCTCATTGGTGGCGACTAGATAAGGAAGGAATGACGCAAGGACATATGGGCGTAGACGAAGCTATGTACGATTATATAAGCTGTTGCCGCCATCAAATAAACGCCATTTTACCATCCACCACATTGGTGTGCACCTGGGTAGATGGACAGACCGTTGAGTCCCTAACGATTGCGAACACCTGAATGAAGCAGAAGGCTTCATTTGGTGACCCCGACGTGATCGTTAGGGAATAGTGGTCGGCCACAGACGGCGTGGCGATCCTGCCCTCATCCGTCTCGCTTAACGGAGCGAGGACGATGACCCTAGTAGAGGGGGCTGCGGCTTAGGAGGGCAGAAGCTGAGTGACGTCGGAGGGAGCTCCACGGCCGGGGGCCAAGATAACCTACCGAGAACTCAGAGAGTCGTTGGAAGACGGGAAGGAAGCCCGACGACTGAGCAGTCCACCCCAGGCACGATTCCGGTCGCCCTGTGGGTCTAGCATGGAAGCCGTCATAAAGGTGATTTCGTCCGCGTGTAAAACCTATTGCGGGAAAACCTCTCCTTCTAAGAAGGAAATAGGGGCCATGTTGTCCCTGTTACAAAAGGAAGGGTTGCTTATGTCTCCCTCAGACTTATATTCCCCGGGGTCCTGGGATCCCATTACCGCGGCGCTCTCCCAGCGGGCAATGGTACTTGGGAAATCGGGAGAGTTAAAAACCTGGGGATTGGTTTTGGGGGCATTGAAGGCGGCTCGAGAGGAACAGGTTACATCTGAGCAAGCAAAGTTTTGGTTGGGATTAGGGGGAGGGAGGGTCTCTCCCCCAGGTCCGGAGTGCATCGAGAAACCAGCAACGGAGCGGCGAATCGACAAAGGGGAGGAAGTGGGAGAAACAACTGCGCAGCGAGATGCGAAGATGGCGCCGGAGAAAATGGCCACACCTAAAACCGTTGGCACATCCTGCTATCAGTGCGGAACAGCTACTGGCTGTAATTGCGCCACAGCCTCGGCCCCTCCTCCTCCTTATGTGGGGAGTGGTTTGTATCCTTCCCTGGCGGGGGTGGGAGAGCAGCAGGGCCAGGGGGGTGACACACCTTGGGGGGCGGAACAGCCAAGGGCGGAGCCAGGGCACGCGGGTCTGGCCCCTGGGCCGGCCCTGACTGACTGGGCAAGGATCAGGGAGGAGCTTGCGAGTACAGGTCCGCCCGTGGTGGCCATGCCTGTAGTGATTAAGACAGAGGGACCCGCCTGGACCCCTCTGGAGCCAAAATTGATCACAAGACTGGCTGATACGGTCAGGACCAAGGGCTTACGATCCCCGATCACTATGGCAGAAGTGGAAGCGCTCATGTCCTCCCCGCTGCTGCCGCATGACGTCACGAATCTAATGAGAGTTATTTTAGGACCTGCCCCATATGCCTTATGGATGGACGCTTGGGGAGTCCAACTACAGACGGTTATAGCGGCAGCCACTCGCGACCCCCGACACCCAGCGAACGGTCAAGGGCGGGGGGAACGGACTAACTTGGATCGTTTAAAGGGTTTGGCGGATGGAATGGCCGGCAATCCAGAGGGTCAGGCTGCATTATTAAGACCGGGGGAACTGGTTGCTATTACGGCGTCGGCTCTCCAGGCGTTTAGAGAGGTCGCTCGGTTGGCGGAACCCACAGACCCGTGGGCGGAAATTACGCAGGGACCATCTGAGTCCTTTGTGGATTTTGCCAATCGTCTTATAAAGGCGGTTGAAGGGTCAGATCTCCCACCTTCCGCGCGGGCTCCGGTGATCATTGACTGCTTTAGGCAGAAGTCACAGCCAGATATTCAGCAGCTTATACGGGCAGCACCCTCCACGCTGACCACCCCAGGAGAGATAATCAAATATGTGCTAGACAGGCAGAAGACTGCCCCTCTTACGGATCAAGGCATAGCCGCGGCCATGTCGTCTGCTATCCAGCCCTTAGTTATGGCAGTAGTCAATAGAGAGAGGGATGGACAAACTGGGTCGGGTGGTCGTGCCCGAGGGCTCTGCTACACTTGTGGATCCCCGGGACATTATCAGGCGCAGTGCCCGAAAAAACGAAAGTCAGGAAACAGCCGTGAGCGATGTCAGCTGTGTGACGGGATGGGACACAACGCTAAACAGTGCAGAAGGCGGGATGGCAACCAGGGCCAACGCCCAGGAAGAGGCCTCTCTTCGGGGTCGTGGCCCGTCTCTGAGCAGCCTGCCGTCTCGTTAGCGATGACAATGGAACATAAAGATCGCCCCTTGGTTAGGGTCATTCTGACTAACACTGGGAGTCATCCGGTCAAACAGCGTTCGGTGTATATCACCGCGCTGTTGGACTCTGGAGCGGACATCACTATTATTTCAGAGGAGGACTGGCCCACCGATTGGCCAGTGATGGAGGCCGCGAACCCGCAGATCCATGGGATAGGAGGGGGAATTCCCATGCGAAAATCCCGGGATATGATAGAGGTGGGGGTTATTAACCGAGACGGGTCTTTGGAGCGACCCCTGCTCCTCTTCCCCGCAGTAGCTATGGTTAGAGGGAGTATCCTAGGAAGAGATTGTCTGCAGGGCCTAGGGCTCCGCTTGACAAATTTATAGGGAGGGCCACTGTTCTTACTGTTGCGCTACATCTGGCTATTCCGCTCAAATGGAAGCCAGACCACACGCCTGTGTGGATTGACCAGTGGCCCCTTCCTGAAGGTAAACTTGTAGCGCTAACGCAATTAGTGGAAAAAGAATTACAGTTAGGACATATAGAACCTTCACTTAGTTGTTGGAACACACCTGTCTTTGTGATCCGGAAGGCTTCCGGGTCTTATCGCTTATTGCATGACTTGCGCGCTGTTAACGCCAAGCTTGTTCCTTTTGGGGCCGTCCAACAGGGGGCGCCAGTTCTCTCCGCGCTCCCGCGTGGCTGGCCCCTGATGGTCCTAGACCTCAAGGATTGCTTCTTTTCTATTCCTCTTGCGGAACAAGATCGCGAAGCTTTTGCATTTACGCTCCCCTCTGTGAATAACCAGGCCCCCGCTCGAAGATTCCAATGGAAGGTCTTGCCCCAAGGGATGACCTGTTCTCCCACTATCTGTCAGTTGGTGGTGGGTCAGGTACTTGAGCCCTTGCGACTCAAGCACCCATCTCTGCGCATGTTGCATTATATGGATGATCTTTTGCTAGCCGCCTCAAGTCATGATGGGTTGGAAGCGGCAGGGGAGGAGGTTATCAGTACATTGGAAAGAGCCGGGTTCACCATTTCGCCTGATAAGATCCAGAGGGAGCCCGGAGTACAATATCTTGGGTACAAGTTAGGCAGTACGTATGTAGCACCCGTAGGCTTGGTAGCAGAACCCAGGATAGCCACCTTGTGGGATGTTCAAAAGCTGGTGGGGTCACTTCAGTGGCTTCGCCCAGCGTTAGGAATCCCGCCACGACTGATGGGCCCCTTTTATGAGCAGTTACGAGGGTCAGATCCTAACGAGGCGAGGGAATGGAATCTAGACATGAAAATGGCCTGGAGAGAGATCGTACAGCTCAGCACCACTGCTGCCTTGGAACGATGGGACCCTGCCCTGCCTCTGGAAGGAGCGGTCGCTAGATGTGAACAGGGGGCAATAGGGGTCCTGGGACAGGGACTGTCCACACACCCAAGGCCATGTTTGTGGTTATTCTCCACCCAACCCACCAAGGCGTTTACTGCTTGGTTAGAAGTGCTCACCCTTTTGATTACTAAGCTACGCGCTTCGGCAGTGCGAACCTTTGGCAAGGAGGTTGATATCCTCCTGTTGCCTGCATGCTTTCGGGAGGACCTTCCGCTCCCGGAGGGGATCCTGTTAGCCCTTAGGGGGTTTGCAGGAAAAATCAGGAGTAGTGACACGCCATCTATTTTTGACATTGCGCGTCCACTGCATGTTTCTCTGAAAGTGAGGGTTACCGACCACCCTGTACCGGGACCCACTGTCTTTACCGACGCCTCCTCAAGCACCCATAAGGGGGTGGTAGTCTGGAGGGAGGGCCCAAGGTGGGAGATAAAAGAAATAGCTGATTTGGGGGCAAGTGTACAACAACTGGAAGCACGCGCTGTGGCCATGGCACTTCTGCTGTGGCCGACAACGCCCACTAATGTAGTGACTGACTCCGCGTTTGTCGCGAAAATGTTACTCAAGATGGGACAGGAGGGAGTCCCGTCTACAGCGGCGGCTTTTATTTTAGAGGATGCGTTAAGCCAAAGGTCAGCCATGGCCGCCGTTCTCCACGTGCGGAGTCATTCTGAAGTGCCAGGGTTTTTCACAGAAGGAAATGACGTGGCAGATAGCCAAGCCACCTTTCAAGCGTATCCCTTGAGAGAGGCTAAAGATCTTCATACTGCTCTCCATATTGGACCCCGCGCGCTATCCAAAGCGTGTAATATATCTATGCAGCAGGCTAGGGAGGTTGTTCAGACCTGCCCGCATTGTAATTCAGCCCCTGCGTTGGAGGCCGGGGTAAACCCTAGGGGTTTGGGACCCCTACAGATATGGCAGACAGACTTTACGCTTGAGCCTAGAATGGCCCCCCGTTCCTGGCTCGCTGTTACTGTGGATACCGCCTCATCGGCGATAGTCGTAACTCAGCATGGCCGTGTCACATCGGTTGCTGCACAACATCATTGGGCCACGGCTATCGCCGTTTTGGGAAGACCAAAGGCCATAAAAACAGATAACGGGTCCTGCTTCACGTCTAAATCCACGCGAGAGTGGCTCGCGAGATGGGGGATAGCACACACCACCGGGATTCCGGGTAATTCCCAGGGTCAAGCTATGGTAGAGCGGGCCAACCGGCTCCTGAAAGATAAGATCCGTGTGCTTGCGGAGGGGGACGGCTTTATGAAAAGAATCCCCACCAGCAAACAGGGGGAACTACTAGCCAAGGCAATGTATGCCCTCAATCACTTTGAGCGTGGTGAAAACACAAAAACACCGATACAAAAAACACTGGAGACCTACCGTTCTTACAGAAGGACCCCCGGTTAAAATACGAATAGAGACAGGGGAGTGGGAAAAAGGATGGAACGTGCTGGTCTGGGGACGAGGTTATGCAGCTGTGAAAAACAGGGACACTGATAAGGTTATTTGGGTACCCTCTCGAAAAGTTAAACCGGACATCACCCAAAAGGATGAGGTGACTAAGAAAGATGAGGCGAGCCCTCTTTTTGCAGGCATTTCTGACTGGATACCCTGGGGAGACAAGCAAGAAGGACTCCAAGGAGAAACCGCTAGCAACAAGCAAGAAAGACCCGGAGAAGACACCCTTGCTGCCAACGAGAGTTAATTATATTCTCATTATTGGTGTCTTGGTCTTGTGTGAGGTTACGGGGGTAAGAGCTGATGTCCACTTACTCGAGCAGCCAGGGAACCTTTGGATTACATGGGCCAACCGTACAGGCCAAACGGATTTCTGCCTCTCTACACAGTCAGCCACCTCCCCTTTTCAAACATGTTTGATAGGTATCCCGTCCCCTATTTCCGAAGGTGATTTTAAGGGATACGTCTCTGATAATTGCACCACCTTGGGAACTGACCGGTTAGTCTCGTCAGCCAGCATTACCGGCGGCCCTGACAACAACACCACCCTCACTTATCGAAAGGTTTCATGCTTGCTGTTAAAGCTGAATGTCTCTATGTGGGATGAGCCACCGGAACTACAGCTGCTAGGTTCCCAGTCTCTCCCTAACATTACTAATATTACTCAGATTTCTGGTGTAACCGGGGGATGCGTAGGCTTCGCCCCACACTCCAATCCAAGTGGTGTCTACGGGTGGGGCCGGAGACAGGTTACACACAACTTCTTGATCGCCCCGTGGGTCAATCCTTTCTTTAACAGCGCTTCTAACTCCACGGAACCGTTTACGGTGGTGACAGCGGATAGGCACAATCTTTTTATGGGGAGTGAGTACTGCGGTGCATATGGCTACAGATTTTGGGAAATATATAATTGCTCACACAGATTTTGGGGTTTTGATATTTACACCTGTGGAGATGTGCAGACAGTCAAATCCCCCGAAAAACAGTGTGTGGGGGGAGGAGGTATATGGGTTAATCAATCAAAGGAAATTAATGAGACAGAGCCGTTCAGTTTTACTGCGAACTGTACAGCTAGTAATTTGGGTAATGTCAGCGGATGTTGTGGAAAAACGACCACGATTCTCCCATCAGGGGCGTGGGTCGACAGCACACAAGGTAGTTTCACCAAACCAAAAGCGCTACCACCCGCAATTTTCCTCATTTGTGGGGATCGCGCATGGCAAGGAATTCCTAGTCGTCCGGTAGGGGGCCCCTGCTATTTAGGCAAGCTTACCATGTTAGCACCTAACCATACAGATATTCTCAAGGTGCTTGCCAATTCATCGCGGACAGGTATAAGACGTAAACGAAGCACCTCACACCTGGATGATACATGCTCAGATGAAGTGCAGCTTTGGGGTCCTACAGCAAGAATCTTTGCATCTATCTTAGCCCCGGGGGTAGCAGCTGCGCAAGCCTTAAGAGAAATTGAGAGACTAGCCTGTTGGTCCGTTAAACAGGCTAACTTGACAACATCATTCCTCGGGGACTTATTGGATGATGTCACGAGTATTCGACACGCGGTCCTGCAGAACCGAGCGGCTATTGACTTCTTGCTTCTGGCTCACGGCCATGGCTGTGAGGACGTTGCCGGAATGTGTTGTTTCAATCTGAGTGATCACAGTGAGTCTATACAGAAGAAGTTCCAGCTAATGAAGGAACATGTCAATAAGATCGGCGTGGACAGCGACCCAATCGGAAGTTGGCTGCGAGGATTATTCGGGGGAATAGGGGAATGGGCCGTTCATTTGCTGAAAGGACTGCTTTTGGGGCTTGTAGTTATTTTGTTGCTAGTAGTGTGCCTGCCTTGCCTTTTGCAAATTGTGTCCAGTAGCATCCGAAAGATGATTAATAATTCAATCAGCTATCACACGGAATATAAGAAGTTGCAAAAGGCTTGTAGGCAGCCCGAAAATGGAGCAGTGTAAAGCAGTACATGGGTGGTGGTATGAAACTTGCGAATCGGGCTGTAACGGGGCAAGGCTTGACTGAGGGGACCATAGTATGTATAGGCGAAAGGCGGGGCTTCGGTTGTACGCGGTTAGGAGTCCCCTCAGGATATAGTAGTTGCGCTTTTGCATAGGGAGGGGGAAATGTAGTCAAATAGAGCCAGAGGCAACTTGAAAAGTCTAAAGACCAAATAAGGAAAAAGCAAGACATTCCATATGCTCATTGGTGGCGACTAGATAAGGAAGGAATGACGCAAGGACATATGGGCGTAGACGAAGCTATGTACGATTATATAAGCTGTTGCCGCCATCAAATAAACGCCATTTTACCATCCACCACATTGGTGTGCACCTGGGTAGATGGACAGACCGTTGAGTCCCTAACGATTGCGAACACCTGAATGAAGCAGAAGGCTTCAACCGT
>ALVE3_positive_5848
TGTAGTCAAATAGAGCCAGAGGCAACTTGAATAGTCTAAAGACCAAATAAGGAAAAAGCAAGACATTCCATATGCTCATTGGTGGCGACTAGATAAGGAAGGAATGACGCAAGGACATATGGGCGTAGACGAAGCTATGTACGATTATATAAGCTGTTGCCACCATCAAATAAACGCCATTTTACCATCCACCACATTGGTGTGCACCTGGGTAGATGGACAGACCGTTGAGTCCCTAACGATTGCGAACACCTGAATGAAGCAGAAGGCTTCATTTGGTGACCCCGACGTGATCGTTAGGGAATAGTGGTCGGCCACAGACGGCGTGGCGATCCTGCCCTCATCCGTCTCGCTTAACGGAGCGAGGACGATGACCCTAGTAGAGGGGGCTGCGGCTTAGGAGGGCAGAAGCTGAGTGACGTCGGAGGGAGCTCCACGGCCGGGGGCCAAGATAACCTACCGAGAACTCAGAGAGTCGTTGGAAGACGGGAAGGAAGCCCGACGACTGAGCAGTCCACCTCAGGCACGATTCCGGTCGCCCTGTGGATCAAGCATGGAAGCCGTCATAAAGGTGATTTCGTCCGCGTGTAAAACCTATTGCGGGAAAACCTCTCCTTCTAAGAAGGAAATAGGGGCCATGCTGTCCCTGTTACAAAAGGAAGGGTTGCTTATGTCTCCCTCAGACTTATATTCCCCGGGGTCCTGGGATCCCATTACCGCGGCACTCACCCAGCGGGCAATGGTACTTGGGAAATCGGGAGAGTTAAAAACCTGGGGATTGGTTTTGGGGGCATTGAAGGCGGCTCGAGAGGAACAGGTTACATCTGAGCAAGCAAAGTTTTGGTTGGGATTAGGGGGAGGGAGGGTCTCTCCCCCAGGTCCGGAGTGCATCGAGAAACCAGCAACGGAGCGGCGAATCGACAAGGGGGAGGAAGTGGGAGAAACAACTGTGCAGCGAGATGCGAAGATGGCGCCGGAGGAAACGGCCACACCTAAAACCGTTGGCACATCCTGCTATCATTGCGGAACAGCTATTGGCTGTAATTGCGCCACAGCCTCGGCCCCTCCTCCTCCTTATGTGGGGAGTGGTTTGTATCCTTCCCTGGCGGGGGTGGGAGAGCAGCAGGGCCAGGGGGGTGACACACCTCGGGGGGCGGAACAGCCAAGGGCGGAGCCAGGGCACGCGGGTCTGGCCCCTGGGCCGGCCCTGACTGACTGGGCAAGGATCAGGGAGGAGCTTGCGAGTACAGGTCCGCCCGTGGTGGCCATGCCTGTAGTGATTAAGACAGAGGGACCCGCCTGGACCCCTCTGGAGCCAAAATTGATCACAAGACTGGCTGATACGGTCAGGACCAAGGGCTTACGATCCCCGATCACTATGGCAGAAGTGGAAGCGCTTATGTCCTCCCCGCTGCTGCCGCATGACGTCACGAATCTAATGAGAGTTATTTTAGGACCTGCCCCATATGCCTTATGGATGGACGCTTGGGGAGTCCAACTACAGACGGTTATAGCGGCAGCCACTCGCGACCCCCGACACCCAGCGAACGGTCAAGGGCGGGGGGAACGGACTAACTTGGATCGTTTAAAGGGTTTGGCGGATGGAATGGCCGGCAATCCAGAGGGTCAGGCTGCATTATTAAGACCGGGGGAACTGGTTGCTATTACGGCGTCGGCTCTCCAGGCGTTTAGAGAGGTCGCTCGGTTGGCGGAACCCACAGACCCGTGGGCGGAAATTACGCAGGGACCATCTGAGTCCTTTGTGGATTTTGCCAATCGTCTTATAAAGGCGGTTGAAGGGTCAGATCTCCCACCTTCCGCGCGGGCTCCGGTGATCATTGACTGCTTTAGGCAGAAGTCACAGCCAGATATTCAGCAGCTTATACGGGCAGCACCCTCCACGCTGACCACCCCAGGAGAGATAATCAAATATGTGCTAGACAGGCAGAAGACTGCCCCTCTTACGGATCAAGGCATAGCCGCGGCCATGTCGTCTGCTATCCAGCCCTTAGTTATGGCAGTAGTCAATAGAGAGAGGGATGGACAAACTGGGTCGGGTGGTCGTGCCCGAGGGCTCTGCTACACTTGTGGATCCCCGGGACATTATCAGGCGCAGTGCCCGAAAAAACGAAAGTCAGGAAACAGCCGTGAGCGATGTCAGCTGTGTGACGGGATGGGACACAACGCTAAACAGTGCAGAAGGCGGGATGGCAACCAGGGACAACGCCCAGGAAGAGGCCTCTCTTCGGGGCCGTGGCCCGTCTCTGAGCAGCCTGCCGTCTCGTTAGCGATGACAATGGAACATAAAGATGTTTATATAAACATAAAGGGACCCACTGTCTTTACCGACGCCTCCTCAAGCACCCATAAGGGGGTGGTAGTCTGGAGGGAGGGCCCAAGGTGGGAGATAAAAGAAATAGCTGATTTGGGGGCAAGTGTACAACAACTGGAAGCACGCGCTGTGGCCATGGCACTTCTGCTGTGGCCGACAGCGCCCACTAATGTAGTGACTGACTCCGCGTTTGTTGCGAAAATGTTACTCAAGATGGGACAGGAGGGAGTCCCGTCTACAGCGGCGGCTTTTATTTTAGAGGATGCGTTAAGCCAAAGGTCAGCCATGGCCGCCGTTCTCCACGTGCGGAGTCATTCTGAAGTGCCAGGGTTTTTCACAGAAGGAAATGACGTGGCAGATAGCCAAGCCACCTTTCAAGCGTATCCCTTGAGAGAGGCTAAAGATCTTCATACTGCTCTCCATATTGGACCCCGCGCGCTATCCAAAGCGTGTAATATATCTATGCAGCAGGCTAGGGAGGTTGTTCAGACCTGCCCGCATTGTAATTCAGCCCCTGCGTTGGAGGCCGGGGTAAACCCTAGGGGTTTGGGACCCCTACAGATATGGCAGACAGACTTTACGCTTGAGCCTAGAATGGCCCCCCGTTCCTGGCTCGCTGTTACTGTGGATACCGCCTCATCGGCGATAGTCGTAACTCAGCATGGCCGTGTCACATCGGTTGCTGCACAACATCATTGGGCCACGGCTATCGCCGTTTTGGGAAGACCAAAGGCCATAAAAACAGATAATGGGTCCTGCTTCACGTCTAAATCCACGCGAGAGTGGCTCGCGAGATGGGGGATAGCACACACCACCGGGATTCCGGGTAATTCCCAGGGTCAAGCTATGGTAGAGCGGGCCAACCGGCTCCTGAAAGATAAGATCCGTGTGCTTGCGGAGGGGGACGGCTTTATGAAAAGAATCCCCACCAGCAAACAGGGGGAACTACTAGCCAAGGCAATGTATGCCCTCAATCACTTTGAGCGTGGTGAAAACACAAAAACACCGATACAAAAACACTGGAGACCTACCGTTCTTACAGAAGGACCCCCGGTTAAAATACGAATAGAGACAGGGGAGTGGGAAAAAGGATGGAACGTGCTGGTCTGGGGACGAGGTTATGCAGCTGTGAAAAACAGGGACACTGATAAGGTTATTTGGGTACCCTCTCGAAAAGTTAAACCGGACATCACCCAAAAGGATGAGGTGACTAAGAAAGATGAGGCGAGCCCTCTTTTTGCAGGCATTTCTGACTGGATACCCTGGGGAGACAAGCAAGAAGGACTCCAAGGAGAAACCGCTAGCAACAAGCAAGAAAGACCCGGAGAAGACGCCCTTGCTGCCAACGAGAGTTAATTATATTATTGGTGTCCTGGTCTTGTGTGAGGTTACGGGGGTAAGAGCTGATGTCCACTTACTCGAGCAGCCAGGGAACCTTTGGATTACATGGGCCAACCGTACAGGCCAAACGGATTTCTGCCTCTCTACACAGTCAGCCACCTCCCCTTTTCAAACATGTTTGATAGGTATCCCGTCCCCTATTTCCGAAGGTGATTTTAAGGGATACGTCTCTGATAATTGCACCACCTTGGGAACTGACCGGTTAGTCTCGTCAGCCAGCATTACCGGCGGCCCTGACAACAGCACCACCCTCACTTATCGAAAGGTTTCATGCTTGCTGTTAAAGCTGAATGTCTCTATGTGGGATGAGCCACCGGAACTACAGCTGCTAGGTTCCCAGTCTCTTCCTAACATTACTAATATTACTCAGATTTCTGGTGTAACCGGGGGATGCGTAGGCTTCACCCCACACTCCAATCCAAGTGGTGTCTACGGGTGGGGCCGGAGACAGGTTACACACAACTTCTTGATCGCCCCGTGGGTCAATCCTTTCTTTAACAGCGCTTCTAACTCCACGGAACCGTTTACGGTGGTGACAGCGGATAGGCACAATCTTTTTATGGGGAGTGAGTACTGCGGTGCATATGGCTACAGATTTTGGGAAATATATAATTGCTCACACAGATTTGATAATTTTGATATTTACACCTGTGGAGATGTGCAGACAGTCAAATCCCCCGAAAAACAGTGTGTGGGGGGAGGAGGTATATGGGTTAATCAATCAAAGGAAATTAATGAGACAGAGCCGTTCAGTTTTACTGCGAACTGTACAGCTAGTAATTTGGGTAATGTCAGCGGATGTTGTGGAAAAACGACCACGATTCTCCCATCAGGGGCGTGGATCGACAGCACACAAGGTAGTTTCACCAAACCAAAAGCGCTACCACCCGCAATTTTCCTCATTTGTGGGGATCGCGCATGGCAAGGAATTCCCAGTCGTCCGGTAGGGGGCCCCTGCTATTTAGGCAAGCTTACCATGTTAGCACCTAACCATACAGATATTCTCAAGGTGCTTGCCAATTCATCGCGGACAGGTATAAGACGTAAACGAAACACCTCACACCTGGATGATACATGCTCAGATGAAGTGCAGCTTTGGGGTCCTACAGCAAGAATCTTTGCATCTATCTTAGCCCCGGGGGTAGCAGCTGCGCAAGCCTTAAGAGAAATTGAGAGACTAGCCTGTTGGTCCGTTAAACAGGCTAACTTGACAACATCACTCCTCGGGGACTTATTGGATGATGTCACGAGTATTCGACACGCGGTCCTGCAGAACCGAGCGGCTATTGACTTCTTGCTCCTAGCTCACGGCCATGGCTGTGAGGACGTTGCCGGAATGTGTTGTTTCAATCTGAGTGATCACAGTGAGTCTATACAGAAGAAGTTCCAGCTAATGAAGGAACATGTCAATAAGATCGGCGTGGACAGCGACCCAATCGGAAGTTGGCTGCGAGGATTATTCGAGGGAATAGGGGAATGGGCCGTTCATTTGCTGAAAGGACTGCTTTTGGGGCTTGTAGTTATTTTGTTGCTAGTAGTGTGCCTGCCTTGCCTTTTGCAAATTGTGTCCAGTGGCATCCGAAAGATGATTAATAATTCAATCAGCTATCACACGGAATATAAGAAGTTGCAAAAGGCTTGTAGGCAGCCCGAAAATGGAGCAGTGTAAAGCAGTACATGGGTGGTGGTATGAAACTTGCGAATCGGGCTGTAACGGGGCAAGGCTTGACTGAGGGGACCATAGTATGTATAGGCGAAAGGCGGGGCTTCGGTTGTACGCGGTTAGGAGTCCCCTCAGGATATAGTAGTTGCGCTTTTGCATAGGGAGGGGGAAATGTAGTCAAATAGAGCCAGAGGCAACTTGAATAGTCTAAAGACCAAATAAGGAAAAAGCAAGACATTCCATATGCTCATTGGTGGCGACTAGATAAGGAAGGAATGACGCAAGGACATATGGGCGTAGACGAAGCTATGTACGATTATATAAGCTGTTGCCACCATCAAATAAACGCCATTTTACCATCCACCACATTGGTGTGCACCTGGGTAGATGGACAGACCGTTGAGTCCCTAACGATTGCGAACACCTGAATGAAGCAGAAGGCTTCAAACCAC
>ALVE9_negative_5077_MT263505
AGGCCGCGAACCCGCAGATCCATGGGATAGGAGGGGGAATTCCCATGCGAAAATCCCGGGATATGATAGAGGTGGGGGTTATTAACCGAGACGGGTCTTTGGAGCGACCCCTGCTCCTCTTCCCCGCAGTAGCTATGGTTAGAGGGAGTATCCTAGGAAGAGATTGTCTGCAGGGCCTAGGGCTCCGCTTGACAAATTTATAGGGAGGGCCACTGTTCTTACTGTTGCGCTACATCTGGCTATTCCGCTCAAATGGAAGCCAGACCACACGCCTGTGTGGATTGACCAGTGGCCCCTTCCTGAAGGTAAACTTGTAGCGCTAACGCAATTAGTGGAAAAAGAATTACAGTTAGGACATATAGAACCTTCACTTAGTTGTTGGAACACACCTGTCTTTGTGATCCGGAAGGCTTCCGGGTCTTATCGCTTATTGCATGACTTGCGCGCTGTTAACGCCAAGCTTGTTCCTTTTGGGGCCGTCCAACAGGGGGCGCCAGTTCTCTCCGCGCTCCCGCGTGGCTGGCCCCTGATGGTCCTAGACCTCAAGGATTGCTTCTTTTCTATTCCTCTTGCGGAACAAGATCGCGAAGCTTTTGCATTTACGCTCCCCTCTGTGAATAACCAGGCCCCCGCTCGAAGATTCCAATGGAAGGTCTTGCCCCAAGGGATGACCTGTTCTCCCACTATCTGTCAGTTGGTAGTGGGTCAGGTACTTGAGCCCTTGCGACTCAAGCACCCATCTCTGCGCATGTTGCATTATATGGATGATCTTTTGCTAGCCGCCTCAAGTCATGATGGGTTGGAAGCGGCAGGGGAGGAGGTTATCAGTACATTGGAAAGAGCCGGGTTCACCATTTCGCCTGATAAGATCCAGAGGGAGCCCGGAGTACAATATCTTGGGTACAAGTTAGGCAGTACGTATGTAGCACCCGTAGGCTTGGTAGCAGAACCCAGGATAGCCACCTTGTGGGATGTTCAAAAGCTGGTGGGGTCACTTCAGTGGCTTCGCCCAGCGTTAGGAATCCCGCCACGACTGATGGGCCCCTTTTATGAGCAGTTACGAGGGTCAGATCCTAACGAGGCGAGGGAATGGAATCTAGACATGAAAATGGCCTGGAGAGAGATCGTACAGCTCAGCACCACTGCTGCCTTGGAACGATGGGACCCTGCCCTGCCTCTGGAAGGAGCGGTCGTTAGATGTGAACAGGGGGCAATAGGGGTCCTGGGACAGGGACTGTCCACACACCCAAGGCCATGTTTGTGGTTATTCTCCACCCAACCCACCAAGGCGTTTACTGCTTGGTTAGAAGTGCTCACCCTTTTGATTACTAAGCTACGCGCTTCGGCAGTGCGAACCTTTGGCAAGGAGGTTGATATCCTCCTGTTGCCTGCATGCTTTCGGGAGGACCTTCCGCTCCCGGAGGGGATCCTGTTAGCCCTTAGGGGGTTTGCAGGAAAAATCAGGAGTAGTGACACGCCATCTATTTTTGACATTGCGCGTCCACTGCATGTTTCTCTGAAAGTGAGGGTTACCGACCACCCTGTACCGGGACCCACTGTCTTTACCGACGCCTCCTCAAGCACCCATAAGGGGGTGGTAGTCTGGAGGGAGGGCCCAAGGTGGGAGATAAAAGAAATAGCTGATTTGGGGGCAAGTGTACAACAACTGGAAGCACGCGCTGTGGCCATGGCACTTCTGCTGTGGCCGACAACGCCCACTAATGTAGTGACTGACTCCGCGTTTGTTGCGAAAATGTTACTCAAGATGGGACAGGAGGGAGTCCCGTCTACAGCGGCGGCTTTTATTTTAGAGGATGCGTTAAGCCAAAGGTCAGCCATGGCCGCCGTTCTCCACGTGCGGAGTCATTCTGAAGTGCCAGGGTTTTTCACAGAAGGAAATGACGTGGCAGATAGCCAAGCCACCTTTCAAGCGTATCCCTTGAGAGAGGCTAAAGATCTTCATACTGCTCTCCATATTGGACCCCGCGCGCTATCCAAAGCGTGTAATATATCTATGCAGCAGGCTAGGGAGGTTGTTCAGACCTGCCCGCATTGTAATTCAGCCCCTGCGTTGGAGGCCGGGGTAAACCCTAGGGGTTTGGGACCCCTACAGATATGGCAGACAGACTTTACGCTTGAGCCTAGAATGGCCCCCCGTTCCTGGCTCGCTGTTACTGTGGATACCGCCTCATCGGCGATAGTCGTAACTCAGCATGGCCGTGTCACATCGGTTGCTGCACAACATCATTGGGCCACGGCTATCGCCGTTTTGGGAAGACCAAAGGCCATAAAAACAGATAACGGGTCCTGCTTCACGTCTAAATCCACGCGAGAGTGGCTCGCGAGATGGGGGATAGCACACACCACCGGGATTCCGGGTAATTCCCAGGGTCAAGCTATGGTAGAGCGGGCCAACCGGCTCCTGAAAGATAAGATCCGTGTGCTTGCGGAGGGGGACGGCTTTATGAAAAGAATCCCCACCAGCAAACAGGGGGAACTACTAGCCAAGGCAATGTATGCCCTCAATCACTTTGAGCGTGGTGAAAACACAAAAACACCGATACAAAAACACTGGAGACCTACCGTTCTTACAGAAGGACCCCCGGTTAAAATACGAATAGAGACGGGGGAGTGGGAAAAAGGATGGAACGTGCTGGTCTGGGGACGAGGTTATGCAGCTGTGAAAAACAGGGACACTGATAAGGTTATTTGGGTACCCTCTCGAAAAGTTAAACCGGACATCACCCAAAAGGATGAGGTGACTAAGAAAGATGAGGCGAGCCCTCTTTTTGCAGGCATTTCTGACTGGATACCCTGGGGAGACAAGCAAGAAGGACTCCAAGGAGAAGCCGCTAGCAACAAGCAAGAAAGACCCGGAGAAGACACCCTTGCTGCCAACGAGAGTTAATTATATTCTCATTATTGGTGTCCTGGTCTTGTGTGAGGTTACGGGGGTAAGAGCTGATGTCCACTTACTCGAGCAGCCAGGGAACCTTTGGATTACATGGGCCAACCGTACAGGCCAAACGGATTTCTGCCTTTCTACACAGTCAGCCACCTCCCCTTTTCAAACATGTTTGATAGGTATCCCGTCCCCTATTTCCGAAGGTGATTTTAAGGGATATGTCTCTGATACAAATTGCGCCACCTTGGGAACTGACCGGTTAGTCTCGTCAGCCAGCATTACCGGCGGCCCTGACAACAGCACCACCCTCACTTATCGAAAGGTTTCATGCTTGCTGTTAAAGCTGAATGTCTCTATGTGGGATGAGCCACCGGAACTACAGCTGCTAGGTTCCCAGTCTCTCCCTAACATTACTAATATTACTCAGATTTCTGGTGTAACCGGGGGATGCGTAGGCTTCGCCCCACACTCCAATCCAAGTGGTGTCTACGGGTGGGGCCGGAGACAGGTTACACACAACTTCTTGATTGCCCCGTGGGTCAATCCTTTCTTTAACAGCGCTTCTAACTCCACGGAACCGTTTATGGTGGTGACAGCGGATAGGCACAATCTTTTTATGGGGAGTGAGTACTGCGGTGCATATGGCTACAGATTTTGGGAAATATATAATTGCTCACACAGATTTGATAGTTTTGATATTTACACCTGTGGAGATGTGCAGACAGTCAAATCCCCCGAAAAACAGTGTGTGGGGGGAGGAGGTATATGGGTTAATCAATCAAAGGAAATTAGTGAGACAGAGCCGTTCAGTTTTACTGCGAACTGTACAGCTAGTAATTTGGGTAATGTCAGCGGATGTTGTGGAAAAACGGCCACGATTCTCCCATCAGGGGCGTGGGTCGACAGCACACAAGGTAGTTTCACCAAACCAAAAGCGCTACCACCCGCAATTTTCCTCATTTGTGGGGATCGCGCATGGCAAGGAATTCCCAGTCGTCCGGTAGGGGGCCCCTGCTATTTAGGCAAGCTTACCATGTTAGCACCTAACCATACAGATATTCTCAAGGTGCTTGCCAATTCATCGCGGACAGGTATAAGACGTAAACGAAGCACCTCACACCTGGATGATACATGCTCAGATGAAGTGCAGCTTTGGGGTCCTACAGCAAGAATCTTTGCATCTATCTTAGCCCCGGGGGTAGCAGCTGCGCAAGCCTTAAGAGAAATTGAGAGACTAGCCTGTTGGTCCGTTAAACAGGCTAACTTGACAACATCACTCCTCGGGGACTTATTGGATGATGTCACGAGTATTCGACACGCGGTCCTGCAGAACCGAGCGGCTATTGACTTCTTGCTTCTAGCTCACGGCCATGGCTGTGAGGACGTTGCCGGAATGTGTTGTTTCAATCTGAGTGATCACAGTGGGTCTATACAGAAGAAGTTCCAGCTAATGAAGGAACATGTCAATAAGATCGGCGTGGACAGCGACCCAATCGGAAGTTGGCTGCGAGGATTATTCGGGGGAATAGGGGAATGGGCCGTTCATTTGCTGAAAGGACTGCTTTTGGGGCTTGTAGTTATTTTGTTGCTAGTAGTGTGCCTGCCTTGCCTTTTGCAAATTGTGTCCAGTAGCATCCGAAAGATGATTAATAATTCAATCAGCTATCACACGGAATATAAGAAGTTGCAAAAGGCTTGTAGGCAGCCCGAAAATGGAGCAGTGTAAAGCAGTACATGGGTGGTGGTATGAAACTTGCGAATCGGGCTGTAACGGGGCAAGGCTTGACTGAGGGGACCATAGTTTGTATAGGCGAAAGGCGGGGCTTCGGTTGTACGCGGTTAGGAGTCCCCTCAGGATACAGTAGTTGCGCTTTTGCATAGGGAGGGGGAAATGTAGTCAAATAGAGCCAGAGGCAACTTGAATAGTCTAAAGACCAAATAAGGAAAAAGCAAGACATTCCATATGCTCATTGGTGGCGACTAGATAAGGAAGGAATGACGCAAGGACATATGGGCGTAGACGAAGCTATGTACGATTATATAAGCTGTTGCCACCATCAAATAAACGCCATTTTACCATTCACCACATTGGTGTGCACCTGGGTAGATGGACAGACCGTTGAGTCCCTAACGATTGCGAACACCTGAATGAAGCTGAAGGCTTCATTTGAG
>ALVE15_negative_soloLTR_280_MT263506
ATAAACTGTAGTCAAATAGAGCCAGAGGCAACTTGAAAAGTCTAAAGACCAAATAAGGAAAAAGCAAGACATTCCATATGCTCATTGGTGGCGACTAGATAAAGAAGGAATGACGCAAGGACATATGGGCGTAGACGAAGCTATGTACGATTATATAAGCTGTTGCCACCATCAAATAAACGCCATTTTACCATCCACCACATTGGTGTGCACCTGGGTAGATGGACAGACCGTTGAGTCCCTAACGATTGCGAACACCTGAACGAAGCAGAAGGCTTCA
>ALVE21_negative_7529
TGTAGTCAAATAGAGCCAGAGGCAACTTGAATAGTCTAAAGACCAAATAAGGAAAAAGCAAGACATTCCATATGCTCATTGGTGGCAACTAGATAAGGAAGGAATGACGCAAGGACATATGGGCGTAGACGAAGCTATGCACGATTATATAAGCTGTTGCCACCATCAAATAAACGCCATTTTACCATTCACCACATTGGTGTGCACCTGGGTAGATGGACAGACCGTTGAGTCCCTAACGATTGCGAACACCTGAATGAAGCTGAAGGCTTCATTTGGTGACCCCGACGTGATCGTTAGGGAATAGTGGTCGGCCACAGGCGGCGTGGCGATCCTGCCCTCATCCGTCTCGCTTAACGGAGCGAGGACGATGACCCTAGTAGAGGGGGCTGCGGCTTAGGAGGGCAGAAGCTGAGTGACGTCGGAGGGAGCTCCACGGCCGGGGGCCAAGATAACCTACCGAGAACTCAGAGAGTCGTTGGAAGACGGGAAGGAAGCCCGACGACTGAGCAGTCCACCCCAGGCGCGATTCCGGTCGCCCGGTGGATCAAGCATGGAAGCCGTCATAAAGGTGATTTCGTCCGCGTGTAAAACCTATTGCGGGAAAACCTCTCCTTCTAAGAAGGAAATAGGGGCCATGTTGTCCCTGTTACAAAAGGAAGGGTTGCTTATGTCTCCCTCAGATTTATATTCCCCGGGGTCCTGGGATCCCATCACTGCGGCGCTCTCCCAGCGGGCAATGGTACTTGGGAAATCGGGAGAGTTAAAAACCTGGGGATTGGTTTTGGGGGCATTGAAGGCGGCTCGAGAGGAACAGGTTACATCTGAGCAAGCAAAGTTTTGGTTGGGATTAGGGGGAGGGAGGGTCTCTCCCCCAGGTCCGGAGTGCATCGAGAAACCAGCAACGGAGCGGCGAATCGACAAAGGGGAGGAAGTGGGAGAAACAACTGCGCAGCGAGATGCGAAGATGGCGCCGGAGAAAATGGCCACACCTAAAACCGTTGGCACATCCTGCTATCAGTGCGGAACAGCTACTGGCTGTAATTGCGCCACAGCCTCGGCCCCTCCTCCTCCTTATGTGGGGAGTGGTTTGTATCCTTCCCTGGCGGGGGTGGGAGAGCAGCAGGGCCAGGGGGGTGACACACCTTGGGGGGCGGAACAGCCAAGGGCGGAGCCAGGGCACGCGGGTCTGGCCCCTGGGCCGGCCCTGACTGACTGGGCAAGGATCAGGGAGGAGCTTGCGAGTACAGGTCCGCCCGTGGTGGCCATGCCTGTAGTGATTAAGACAGAGGGACCCGCCTGGACCCCTCTGGAGCCAAAATTGATCACAAGACTGGCTGATACGGTCAGGACCAAGGGCTTACGATCCCCGATCACTATGGCAGAAGTGGAAGCGCTCATGTCCTCCCCGCTGCTGCCGCATGACGTCACGAATCTAATGAGAGTTATTTTAGGACCTGCCCCATATGCCTTATGGATGGACGCTTGGGGAGTCCAACTACAGACGGTTATAGCGGCAGCCACTCGCGACCCCCGACACCCAGCGAACGGTCAAGGGCGGGGGGAACGGACTAACTTGGATCGTTTAAAGGGTTTGGCGGATGGAATGGCGGGCAATCCAGAGGGTCAGGCTGCATTATTAAGACCGGGGGAACTGGTTGCTATTACGGCGTCGGCTCTCCAGGCGTTTAGAGAGGTCGCTCGGTTGGCGGAACCCACAGACCCGTGGGCGGAAATTACGCAGGGACCATCTGAGTCCTTTGTGGATTTTGCCAATCGTCTTATAAAGGCGGTTGAAGGGTCAGATCTCCCACCTTCCGCGCGGGCTCCGGTGATCATTGACTGCTTTAGGCAGAAGTCACAGCCAGATATCCAGCAGCTTATACGGGCAGCACCCTCCACGCTGACCACCCCAGGAGAGATAATCAAATATGTGCTAGACAGGCAGAAGACTGCCCCTCTTACGGATCGAGGCATAGCCGCGGCCATGTCGTCTGCTATTCAGCCCTTAGTTATGGCAGTAGTCAATAGAGAGAGGGATGGACAAACTGGGTCGGGTGGTCGTGCCCGAGGGCTCTGCTACACTTGTGGATCCCCGGGACATTATCAGGCGCAGTGCCCGAAAAAACGAAAGTCAGGAAACAGCCGTGAGCGATGTCAGTTGTGTGACGGGATGGGACACAACGCTAAACAGTGTAGAAGGCGGGATGGCAACCAGGGCCAACGCCCAGGAAGAGGCCTCTCTTCGGGGCCGTGGCCCGTCTCTCAGCAGCCTGCCGTCTCGTTAGCGATGACAATGGAACATAAAGATCGCCCCTTGGTTAGGGTCATTCTGACTAACACTGGGAGTCATCCGGTCAAACAGCGTTCGGTGTATATCACCGCGCTGTTGGACTCTGGAGCGGACATCACTATTATTTCAGAGGAGGACTGGCCCACCGATTGGCCAGTGATGGAGGCCGCGAACCCGCAGATCCATGGGATAGGAGGGGGAATTCCCATGCGAAAATCCCGGGATATGATAGAGGTGGGGGTTATTAACCGAGACGGGTCTTTGGAGCGACCCCTGCTCCTCTTCCCCGCAGTAGCTATGGTTAGAGGGAGTATCCTAGGAAGAGATTGTCTGCAGGGCCTAGGGCTCCGCTTGACAAATTTATAGGGAGGGCCACTGTTCTTACTGTTGCGCTACATCTGGCTATTCCGCTCAAATGGAAGCCAGACCACACGCCTGTGTGGATTGACCAGTGGCCCCTTCCTGAAGGTAAACTTGTAGCGCTAACGCAATTAGTGGAAAAAGAATTACAGTTAGGACATATAGAACCTTCACTTAGTTGTTGGAACACACCTGTCTTTGTGATCCGGAAGGCTTCCGGGTCTTATCGCTTATTGCATGACTTGCGCGCTGTTAACGCCAAGCTTGTTCCTTTTGGGGCCGTCCAACAGGGGGCGCCAGTTCTCTCCGCGCTCCCGCGTGGCTGGCCCCTGATGGTCCTAGACCTCAAGGATTGCTTCTTTTCTATTCCTCTTGCGGAACAAGATCGCGAAGCTTTTGCATTTACGCTCCCCTCTGTGAATAACCAGGCCCCCGCTCGAAGATTCCAATGGAAGGTCTTGCCCCAAGGGATGACCTGTTCTCCCACTATCTGTCAGTTGGTGGTGGGTCAGGTACTTGAGCCCTTGCGACTCAAGCACCCATCTCTGTGCATGTTGCATTATATGGATGATCTTTTGCTAGCCGCCTCAAGTCATGATGGGTTGGAAGCGGCAGGGGAGGAGGTTATCAGTACATTGGAAAGAGCCGGGTTCACCATTTCGCCTGATAAGATCCAGAGGGAGCCCGGAGTACAATATCTTGGGTACAAGTTAGGCAGTACGTATGTAGCACCCGTAGGCCTGGTAGCAGAACCCAGGATAGCCACCTTGTGGGATGTTCAAAAGCTGGTGGGGTCACTTCAGTGGCTTCGCCCAGCGTTAGGAATCCCGCCACGACTGATGGGCCCCTTTTATGAGCAGTTACGAGGGTCAGATCCTAACGAGGCGAGGGAATGGAATCTAGACATGAAAATGGCCTGGAGAGAGATCGTACAGCTTAGCACCACTGCTGCCTTGGAACGATGGGACCCTGCCCTGCCTCTGGAAGGAGCGGTCGCTAGATGTGAACAGGGGGCAATAGGGGTCCTGGGACAGGGACTGTCCACACACCCAAGGCCATGCTTGTGGTTATTCTCCACCCAACCCACCAAGGCGTTTACTGCTTGGTTAGAAGTGCTCACCCTTTTGATTACTAAGCTACGTGCTTCGGCAGTGCGAACCTTTGGCAAGGAGGTTGATATCCTCCTGTTGCCTGCATGCTTTCGGGAGGACCTTCCGCTCCCGGAGGGGATCCTGTTAGCCCTTAAGGGGTTTGCAGGAAAAATCAGGAGTAGTGACACGCCATCTATTTTTGACATTGCGCGTCCACTGCATGTTTCTCTGAAAGTGAGGGTTACCGACCACCCTGTACCGGGACCCACTGTCTTTACCGACGCCTCCTCAAGCACCCATAAGGGGGTGGTAGTCTGGAGGGAGGGCCCAAGGTGGGAGATAAAAGAAATAGCTGATTTGGGGGCAAGTGTACAACAACTGGAAGCACGCGCTGTGGCCATGGCACTTCTGCTGTGGCCGACAACGCCCACTAATGTAGTGACTGACTCCGCGTTTGTTGCGAAAATGTTACTCAAGATGGGACAGGAGGGAGTCCCGTCTACAGCGGCGGCTTTTATTTTAGAGGATGCGTTAAGCCAAAGGTCAGCCATGGCCGCCGTTCTCCACGTGCGGAGTCATTCTGAAGTGCCAGGGTTTTTCACAGAAGGAAATGACGTGGCAGATAGCCAAGCCACCTTTCAAGCGTATCCCTTGAGAGAGGCTAAAGATCTTCATACTGCTCTCCATATTGGACCCCGCGCGCTATCCAAAGCGTGTAATATATCTATGCAGCAGGCTAGGGAGGTTGTTCAGACCTGCCCGCATTGTAATTCAGCCCCTGCGTTGGAGGCCGGGGTAAACCCTAGGGGTTTGGGACCCCTACAGATATGGCAGACAGACTTTACGCTTGAGCCTAGAATGGCCCCCCGTTCCTGGCTCGCTGTTACTGTGGATACCGCCTCATCGGCGATAGTCGTAACTCAGCATGGCCGTGTCACATCGGTTGCTGCACAACATCATTGGGCCACGGCTATCGCCGTTTTGGGAAGACCAAAGGCCATAAAAACAGATAACGGGTCCTGCTTCACGTCTAAATCCACGCGAGAGTGGCTCGCGAGATGGGGGATAGCACACACCACCGGGATTCCGGGTAATTCCCAGGGTCAAGCTATGGTAGAGCGGGCCAACCGGCTCATGAAAGATAAGATCCATGTGCATGCGGAGGGGGACGGCTTTATGAAAAGAATCCCCACCAGCAAACAGGGGGAACTACTAGCCAAGGCAATGTATGCCCTCAATCACTTTGAGCGTGGTGAAAACACAAAAACACCGATACAAAAACACTGGAGGCCTACCGTTCTTACAGAAGGACCCCCGGTTAAAATACGAATAGAGACAGGGGAGTGGGAAAAAGGATGGAACGTGCTGGTCTGGGGACGAGGTTATGCCGCTGTGAAAAACAGGGACACTGATAAGGTTATTTGGGTACCCTCTCGAAAAGTTAAACCGGACATCACCCAAAAGGATGAGGTGACTAAGAAAGATGAGGCGAGCCCTCTTTTTGCAGGCATTTCTGACTGGATACCCTGGGGAGACGAGCAAGAAGGACTCCAAGGAGAAACCGCTAGCAACAAGCAAGAAAGACCCGGAGAAGACACCCTTGCTGCCAACAAGAGTTAATTATATTCTCATTATTGGTGTCCTGGTCTTGTGTGAGGTTACGGGGGTAAGAGCTGATGTTCACTAACTCGAGCAGCCAGGGAACCTTTGGATTACATGGGCCAACCGTACAGGCCAAACGGATTTCTGCCTCTCTACACAGTCAGCCACCTCCCCTTTTCAAACATGTTTGATAGGTATCCCGTCCCCTATTTCCGAAGGTGATTTTAAGGGATACGTCTCTGATAATTGCACCACCTTGGGAACTGACCGGTTAGTCTCGTCAGCCAGCATTACCGGCGGCCCTGACAACAGCACCACCCTCACTTATCGAAAGGTTTCATGCTTGCTGTTAAAGCTGAATGTCTCTATGTGGGATGAGCCACCGGAACTACAGCTGCTAGGTTCCCAGTCTCTCCCTAACATTACTAATATTACTCAGATTTCTGGTGTAACTGGGGGATGCGTAGGCTTCACCCCACACTCCAATCCAAGTGGTGTTTACGGGTGGGACCGGAGACAGGTTACACACAACTTCTTGATCGCCCCGTGGGTCAATCCTTTCTTTAACAGCGCTTCTAACTCCACGGAACCGTTTACGGTGGTGACAGCGGATAGACACAATCTTTTTATGGGGAGTGAGTACTGCGGTGCATATGGCTACAGATTTTGGGAAATATATAATTGCTCACACAGATTTGATAATTTTGATATTTACACCTGTGGAGATGTGCAGACAGTCAAATCCCCCGAAAAACAGTGTGTGGGGGGAGGAGGTATATGGGTTAATCAATCAAAGGAAATTAATGAGACAGAGCCGTTCAGTTTTACTGCGAACTGTACAGCTAGTAATTTGGGTAATGTCAGCGGATGTTGTGGAAAAACGATCACGATTCTCCCATCAGGGGCGTGGATCGACAGCACACAAGGTAGTTTCACTAAACCAAAAGCGCTACCACCCGCAATTTTCCTCATTTGTGGGGATCGCGCATGGCAAGGAATTCCCAGTCGTCCGGTAGGGGGCCCCTGCTATTTAGGCAAGCTTACCATGTTAGCACCCAACCATACAGATATTCTCAAGGTGCTTGCCAATTCATCGCGGACAGGTATAAGACGTAAACGAAGCACCTCACACCTGGATGATACATGCTCAGATGAAGTGCAGCTTTGGGGTCCTACAGCAAGAATCTTTGCATCTATCTTAGCCCCGGGGGTAGCAGCTGCGCAAGCCTTAAGAGAAATCGAGAGACTAGCCTGTTGGTCCGTTAAACAGGCTAACTTGACAACATCACTCCTCGGGGACTTATTGGATGATGTCACGAGTATTCGACACGCGGTCCTGCAGAACCGAGCGGCTATTGACTTCTTGCTTCTAGCTCACGGCCATGGCTGTGAGGACGTTGCCGGAATGTGTTGTTTCAATCTGAGTGATCACAGTGAGTCTATACAGAAGAAGTTCCAGCTAATGAAGGAACATGTCAATAAGATCGGCGTGGACAGCGACCCAATCGGAAGTTGGCTGCGAGGATTATTCGAGGGAATAGGGGAATGGGCCGTTCATTTGCTGAAAGGACTGCTTTTGGGGCTTGTAGTTATCTTGTTGCTAGTAGTGTGCCTGCCTTGCCTTTTGCAAATTGTGTCCAGTAGCATCCGAAAGATGATTAATAATTCATCAGCTGTCACACGGAATATAAGAAGTTGCAAAAGGCTTGTAGGCAGCCCGAAAATAGAGCAGTGTAAAGCAGTACGTGGGTGGTGGTATGAAACTTGCGAATCGGGCTGTAACGGGGCAAGGCTTGACTGAGGGGACCATAGTATGTATAGGCGAAAGGCGGGGCTTCGGTTGTACGCGGTTAGGAGTCCCCTCAGGATATAGTAGTTGCGCTTTTGCATAGGGAGGGGGAAATGTAGTCAAATAGAGCCAGAGGCAACTTGAATAGTCTAAAGACCAAATAAGGAAAAAGCAAGACATTCCATATGCTCATTGGTGGCAACTAGATAAGGAAGGAATGACGCAAGGACATATGGGCGTAGACGAAGCTATGCACGATTATATAAGCTGTTGCCACCATCAAATAAACGCCATTTTACCATTCACCACATTGGTGTGCACCTGGGTAGATGGACAGACCGTTGAGTCCCTAACGATTGCGAACACCTGAATGAAGCTGAAGGCTTCACTACCC
>ALVEB5_positive_7530_MT263507
TGTAGTCAAATAGAGCCAGAGGCAACTTGAATAGTCTAAAGACCAAATAAGGAAAAAGGAAGACATTCCATATGCTCATTGGTGGCGACTAGATAAGGAAGGAATGACGCAAGGACATATGGGCGTAGACGAAGCTATGTACGATTATATAAGCTGTTGCCACCATCAAATAAACGCCATTTTACCATTCACCACATTGGTGTGCACCTGGGTAGATGGACAGACCGTTGAGTCCCTAACGATTGCGAACACCTGAATGAATCAGAAGGCTTCATTTGGTGACCCCGACGTGATTGTTAGGGAATAGTGGTCGGCCACAGACGGCGTGGCGATCCTGCCCTCATCCGTCTCGCTTAACGGAGCGAGGACGATGACCCTAGTAGAGGGGGCTGCGGCTTAGGAGGGCAGAAGCTGAGTGACGTCGGAGGGAGCTCCACGGCCGGGGGCCAAGATAACCTACCGAGAACTCAGAGAGTCGTTGGAAGACGGGAAGGAAGCCCGACGACTGAGCAGTCCACCCCAGGCACGATTCCGGTCGCCCTGTGGATCGAGCATGGAAGCCGTCATAAAGGTGATTTCGTCCGCGTGTAAAACCTATTGCGGGAAAACCTCTCCTTCTAAGAAGGAAATAGGGGCCATGTTGTCCCTGTTACAAAAGGAAGGGTTGCTTATGTCTCCCTCAGACTTATATTCCCCGGGGTCCTGGGATCCCATTACCGCGGCGCTCTCCCAGCGGGCAATGGTACTTGGGAAATCGGGAGAGTTAAAAACCTGGGGATCGGTTTTGGGGGCATTGAAGGCGGCTCGAGAGGAACAGGTTACATCTGAGCAAGCAAAGTTTTGGTTGGGATTAGGGGGAGGGAGGGTCTCTCCCCCAGGTCCGGAGTGCATCGAGAAACCAACAACGGAGCGGCGAATCGACAAAGGGGAGGAAGTGGGAGAAACAACTGTGCAGCGAGATGCGAAGATGGCGCCGGAGAAAATGGCCACACCTAAAACCGTTGGCACATCCTGCTATCATTGCGGAACAGCTACTGGCTGTAATTGCGCCACAGCCTCGGCCCCTCCTCCTTATGTGGGGAGTGGTTTGTATCCTTCCCTGGTGGGGGTGGGAGAGCAGCAGGGCCAGGGGGGTGACATACCTTGTGGGGCGGAACAGCCAAGGGCGGAGCCAGGGCACACGGGTCTGGCCCCTGGGCCGGCCCTGACTGACTGGGCAAGGATCAGGGAGGAGCTTGCGAGTACAGGTCCGCCCGTGGTGGCCATGCCTGTAGTGATTAAGACAGAGGGACCCGCCTGGACCCCTCTGGAGCCAAAATTGATCACAAGACTGGCTGATACGGTCAGGACCAAGGGCTTACGATCCCCGATCACTATGGCAGAAGTGGAAGCGCTCATGTCCTCCCCGCTGCTGCCGCATGACGTCACGAATCTAATGAGAGTTATTTTAGGACCTGCCCCATATGCCTTATGGATGGACGCTTGGGGGAGTCCAACTACAGACGGTTATAGCGGCAGCCACTCGCGACCCCCGACACCCAGCGAACGGTCAAGGGCGGGGGGAACGGACTAACTTGGATCGTTTAAAGGGTTTGGCGGATGGAATGGCCGGCAATCCAGAGGGTCAGGCTGCATTATTAAGACCGGGGGAACTGGTTGCTATTACGGCGTCGGCTCTCCAGGCGTTTAGAGAGGTCGCTCGGTTGGCGGAACCCACAGACCCGTGGGCGGAAATTACGCAGGGACCATCTGAGTCCTTTGTGGATTTTGCCAATCGTCTTATAAAGGCGGTTGAAGGGTCAGATCTCCCACCTTCCGCGCGGGCCCCGGTGATCATTGACTGCTTTAGGCAGAAGTCACAGCCAGATATTCAGCAGCTTATACGGGCAGCACCCTCCACGCTGACCACCCCAGGAGAGATAATCAAATATGTGCTAGACAGGCAGAAGACTGCCCCTCTTACGGATCAAGGCATAGCCGCGGCCATGTCGTCTGCTATCCAGCCCTTAGTTATGGCAGTAGTCAATAGAGAGAGGGATGGACAAACTGGGTCGGGTGGTCGTGCCCGAGGGCTCTGCTACACTTGTGGATCCCCGGGACATTATCAGGCGCAGTGCCCGAAAAAACGAAAGTCAGGAAACAGCCGTGAGCGATGTCAGCTGTGTGATGGGATGGGACACAACGCTAAACAGTGCAGAAGGCGGGATGGCAACCAGGGCCATCGCCCAGGAAGAGGCCTCTCTTCGGGGCCGTGGCCCGTCTCTGAGCAGCCTGCCGTCTCGTTAGCGATGACAATGGAACATAAAGATCGCCCCTTGGTTAGGGTCATTCTGACTAACACTGGGAGTCATCCGGTCAAACAGCGTTCGGTGTATATCACCGCGCTGTTGGACTCTGGAGCGGACATCACTATTATTTCAGAGGAGGACTGGCCCACCGATTGGCCAGTGATGGAGGCCGCGAACCCGCAGATCCATGGGATAGGAGGGGGAATTCCCATGCGAAAATCCCGGGACATGATAGAGGTGGGGGTTATTAACCGAGACGGGTCTTTGGAGCGACCCCTGCTCCTCTTCCCCGCAGTAGCTATGGTTAGAGGGAGTATCCTAGGAAGAGATTGTCTGCAGGGCCTAGGGCTCCGCTTGACAAATTTATAGGGAGGGCCACTGTTCTTACTGTTGCGCTACATCTGGCTATTCCGCTTAAATGGAAGCCAGACCACACGCCTGTGTGGATTGACCAGTGGCCCCTTCCTGAAGGTAAACTTGTAGCGCTAACGCAATTAGTGGAAAAAGAATTACAGTTAGGACATATAGAACCTTCACTTAGTTGTTGGAACACACCTGTCTTTGTGATCCGGAAGGCTTCCGGGTCTTATCGCTTATTGCATGACTTGCGCGCTGTTAACGCCAAGCTTGTTCCTTTTGGGGCCGTCCAACAGGGGGCGCCAGTTCTCTCCGCGCTCCCGCGTGGCTGGCCCCTGATGGTCCTAGACCTCAAGGATTGCTTCTTTTCTATTCCTCTTGCGGAACAAGATCGCGAAGCTTTTGCATTTACGCTCCCCTCTGTGAATAACCAGGCCCCCGCTCGAAGATTCCAATGGAAGGTCTTGCCCCAAGGGATGACCTGTTCTCCCACTATCTGTCAGTTGGTAGTGGGTCAGGTACTTGAGCCCTTGCGACTCAAGCACCCATCTCTGCGCATGTTGCATTATATGGATGATCTTTTGCTAGCCGCCTCAAGTCATGATGGGTTGGAAGCGGCAGGGGAGGAGGTTATCAGTACATTGGAAAGAGCCGGGTTCACCATTTCGCCTGATAAGATCCAGAGGGAGCCCGGAGTACAATATCTTGGGTACAAGTTAGGCAGTACGTATGTAGCACCCGTAGGCTTGGTAGCAGAACCCAGGATAGCCACCTTGTGGGATGTTCAAAAGCTGGTGGGGTCACTTCAGTGGCTTCGCCCAGCGTTAGGAATCCCGCCACGACTGATGGGCCCCTTTTATGAGCAGTTACGAGGGTCAGATCCTAACGAGGCGAGGGAATGGAGTCTAGACATGAAAATGGCCTGGAGAGAGATCGTACAGCTCAGCACCACTGCTGCCTTGGAACGATGGGACCCTGCCCTGCCTCTGGAAGGAGCGGTCGCTAGATGTGAACAGGGGGCAATAGGGGTCCTGGGACAGGGACTGTCCACACACCCAAGGCCATGTTTGTGGTTATTCTCCACCCAACCCACCAAGGCGTTTACTGCTTGGTTAGAAGTGCTCACCCTTTTGATTACTAAGCTACGCGCTTCGGCAGTGCGAACCTTTGGCAAGGAGGTTGATATCCTCCTGTTGCCTGCATGCTTTCGGGAGGACCTTCCGCTCCCGGAGGGGATCCTGTTAGCCCTTAGGGGGTTTGCAGGAAAAATCAGGAGTAGTGACACGCCATCTATTTTTGACATTGCGCGTCCACTGCATGTTTCTCTGAAAGTGAGGGTTACCGACCACCCTGTACCGGGACCCACTGTCTTTACCGACGCCTCCTCAAGCACCCATAAGGGGGTGGTAGTCTGGAGGGAGGGCCCAAGGTGGGAGATAAAAGAAATAGCTGATTTGGGGGCAAGTGTACAACAACTGGAAGCACGCGCTGTGGCCATGGCACTTCTGCTGTGGCCGACAACGCCCACTAATGTAGTGACTGACTCCGCGTTTGTTGCGAAAATGTTACTCAAGATGGGACAGGAGGGAGTCCCGTCTACAGCGGCGGCTTTTATTTTAGAGGATGCGTTAAGCCAAAGGTCAGCCATGGCCGCCGTTCTCCACGTGCGGAGTCATTCTGAAGTGCCAGGGTTTTTCACAGAAGGAAATGACGTGGCAGATAGCCAAGCCACCTTTCAAGCGTATCCCTTGAGAGAGGCTAAAGATCTTCATACTGCTCTCCATATTGGACCCCGCGCGCTATCCAAAGCGTGTAATATATCTATGCAGCAGGCTAGGGAGGTTGTTCAGACCTGCCCGCATTGTAATTCAGCCCCTGCGTTGGAGGCCGGGGTAAACCCTAGGGGTTTGGGACCCCTACAGATATGGCAGACAGACTTTACGCTTGAGCCTAGAATGGCCCCCCGTTCCTGGCTCGCTGTTACTGTGGATACCGCCTCATCGGCGATAGTCGTAACTCAGCATGGCCGTGTCACATCGGTTGCTGCACGACATCATTGGGCCACGGCTATCGCCGTTTTGGGAAGACCAAAGGCCATAAAAACAGATAACGGGTCCTGCTTCACGTCTAAATCCACGCGAGAGTGGCTCGCGAGATGGGGGATAGCACACACCACCGGGATTCCGGGTAATTCCCAGGGTCAAGCTATGGTAGAGCGGGCCAACCGGCTCCTGAAAGATAAGATCCGTGTGCTTGCGGAGGGGGACGGCTTTATGAAAAGAATCCCCACCAGCAAGCAGGGGGAACTACTAGCCAAGGCAATGTATGCCCTCAATCACTTTGAGCGTGGTGAAAACACAAAAACACCGATACAAAAACACTGGAGACCTACTGTTCTTACAGAAGGACCCCCGGTTAAAATACGAATAGAGACAGGGGAGTGGGAAAAAGGATGGAACGTGCTGGTCTGGGGACGAGGTTATGCAGCTGTGAAAAACAGGGACACTGATAAGGTTATTTGGGTACCCTCTCGAAAAGTTAAACCGGACATCACCCAAAAGGATGAGGTGACTAAGAAAGATGAGGCGAGCCCTCTTTTTGCAGGCATTTCTGACTGGATACCCTGGGGAGACAAGCAAGAAGGACTCCAAGGAGAAACCGCTAGCAACAAGCAAGAAAGACCCGGAGAAGACACCCTTGCTGCCAACGAGAGTTAATTATATTCTCATTATTGGTGTCCTGGTCTTGTGTGAGGTTACGGGGGTAAGAGCTGATGTCCACTTACTCGAGCAGCCAGGGAACCTTTGGATTACATGGGCCAACCGTACAGGCCAAACGGATTTCTGCCTCTCTACACAGTCAGCCACCTCCCCTTTTCAAACATGTTTGATAGGTATCCCATCCCCTATTTCCGAAGGTGATTTTAAGGGATATGTCTCTGATACAAATTGCACCACCTTGGGAACTGACCGGTTAGTCTCGTCAGCCAGCATTACCGGCGGCCCTGACAACAGCACCACCCTCACTTATCGAAAGGTTTCATGCTTGCTGTTAAAGCTGAATGTCTCTATGTGGGATGAGCCACCGGAACTACAGCTGCTAGGTTCCCAGTCTCTCCCTAACATTACTAATATTACTCAGATTTCTGGTGTAACCGGGGGATGCGTAGGCTTCGCCCCACACTCCAATCCAAGTGGTGTCTACGGGTGGGGCCGGAGACAGGTTACACACAACTTCTTGATCGCCCCGTGGGTCAATCCTTTCTTTAACAGCGCTTCTAACTCCACGGAACCGTTTACGGTGGTGACAGCGGATAGGCACAATCTTTTATGGGGAGTGAGTACTGCGGTGCATATGGCTACAGATTTTGGGAAATATATAATTGCTCACACAGATTTGATAATTTTGATATTTACACCTGTGGAGATGTGCAGACAGTCAAATCCCCCGAAAAACAATGTGTGGGGGGAGGAGGTATATGGGTTAATCAATCAAAGGAAATTAATGAGACAGAGCCGTTCAGTTTTACTGCGAACTGTACAGCTAGTAATTTGGGTAATGTCAGCGGATGTTGTGGAAAAACGACCACGATTCTCCCATCAGGGGCGTGGGTCGACAGCACACAAGGTAGTTTCACCAAACCAAAAGCGCTACCACCCGCAATTTTCCTCATTTGTGGGGATCGCGCATGGCAAGGAATTCCCAGTCGTCCGGTAGGGGGCCCCTGCTATTTAGGCAAGCTTACCATGTTAGCACCTAACCATACAGATATTCTCAAGGTGCTTGCCAATTCATCGCGGACAGGTATAAGACGTAAACGAAACACCTCACACCTGGATGACACATGCTCAGATGAAGTGCAGCTTTGGGGTCCTACAGCAAGAATCTTTGCATCTATCTTAGCCCCGGGGGTAGCAGCTGCGCAAGCCTTAAGAGAAATTGAGAGACTAGCCTGTTGGTCCGTTAAACAGGCTAACTTGACAACATCACTCCTCGGGGACTTATTGGATGATGTCACGAGTATTCGACACGCGGTCCTGCAGAACCGAGCGGCTATTGACTTCTTGCTTCTAGCTCACGGCCATGGCTGTGAGGACGTTGCCGGAATGTGTTGTTTCAATCTGAGTGATCACAGTGAGTCTATACAGAAGAAGTTCCAGTTAATGAAGGAACATGTCAATAAGATCGGCGTAGACAGCGACCCAATCAGAAGTTGGCTGCGAGGATTATTCGGGGGAATAGGGGAATGGGCCGTTCATTTGCTGAAAGGACTGCTTTTGGGGCTTGTAGTTATTTTGTTGCTAGTAGTGTGCCTGCCTTGCCTTTTGCAAATTGTGTCCAGTAGCATCCGAAAGATGATTAATAATTCAATCAGCTATCACACGGAATATAAGAAGTTGCAAAAGGCTTGTAGGCAGCCCGAAAATGGAGCAGTGTAAAGCAGTACATGGGTGGTGGTATGAAACTTGCGAATCGGGCTGTAACGGGGCAAGGCTTGACTGAGGGGACTATAGTATGTATAGGCGAAAGGCGGGGCTTCGGTTGTACGCGGTTAGGAGTCCCCTCAGGATATAGTAGTTGCGCTTTTGCATAGGGAGGGGGAAATGTAGTCAAATAGAGCCAGAGGCAACTTGAATAGTCTAAAGACCAAATAAGGAAAAAGGAAGACATTCCATATGCTCATTGGTGGCGACTAGATAAGGAAGGAATGACGCAAGGACATATGGGCGTAGACGAAGCTATGTACGATTATATAAGCTGTTGCCACCATCAAATAAACGCCATTTTACCATTCACCACATTGGTGTGCACCTGGGTAGATGGACAGACCGTTGAGTCCCTAACGATTGCGAACACCTGAATGAAGCAGAAGGCTTCAGGTGGT
>ALVE-TYR_positive_7534_MT263508
TGTAGTCAAATAGAGCCAGAGGCAACTTGAATAGTCTAAAGACCAAATAAGGAAAAAGCAAGACATTCCATATGCTCATTGGTGGCAACTAGATAAGGAAGGAATGACGCAAGGACATATGGGCGTAGACGAAGCTATGCACGATTATATAAGCTGTTGCCACCATCAAATAAACGCCATTTTACCATTCACCACATTGGTGTGCACCTGGGTAGATGGACAGACCGTTGAGTCCCTAACGATTGCGAACACCTGAATGAAGCTGAAGGCTTCATTTGGTGACCCCGACGTGATCGTTAGGGAATAGTGGTCGGCCACAGGCGGCGTGGCGATCCTGCCCTCATCCGTCTCGCTTAACGGAGCGAGGACGATGACCCTAGTAGAGGGGGCTGCGGCTTAGGAGGGCAGAAGCTGAGTGACGTCGGAGGGAGCTCCACGGCCGGGGGCCAAGATAACCTACCGAGAACTCAGAGAGTCGTTGGAAGACGGGAAGGAAGCCCGACGACTGAGCAGTCCACCCCAGGCGCGATTCCGGTCGCCCGGTGGATCAAGCATGGAAGCCGTCATAAAGGTGATTTCGTCCGCGTGTAAAACCTATTGCGGGAAAACCTCTCCTTCTAAGAAGGAAATAGGGGCCATGTTGTCCCTGTTACAAAAGGAAGGGTTGCTTATGTCCCTCTCAGACTTATATTCCCCGGGGTCCTGGGATCCCATTACCGCGGCACTCACCCAGCGGGCAATGGTACTTGGGAAATCGGGAGAGTTAAAAACCTGGGGATTGGTTTTGGGGGCATTGAAGGCGGCTCGAGAGGAACAGGTTACATCTGAGCAAGCAAAGTTTTGGTTGGGATTAGGGGGAGGGAGGGTCTCTCCCCCAGGTCCGGAGTGCATCGAGAAACCAGCAACGGAGCGGCGAATCGACAAGGGGGAGGAAGTGGGAGAAACAACTGTGCAGCGAGATGCGAAGATGGCGCCGGAGGAAACGGCCACACCTAAAACCGTTGGCACATCCTGCTATCATTGCGGAACAGCTATTGGCTGTAATTGCGCCACAGCCTCGGCCCCTCCTCCTCCTTATGTGGGGAGTGGTTTGTATCCTTCCCTGGCGGGGGTGGGAGAGCAGCAGGGCCAGGGGGGTGACACACCTCGGGGGGCGGAACAGCCAAGGGCGGAGCCAGGGCACGCGGGTCAGGCCCCTGGGCCGGCCCTGACTGACTGGGCAAGGATCAGGGAGGAGCTTGCGAGTACAGGTCCGCCCGTGGTGGCCATGCCTGTAGTGATTAAGACAGAGGGACCCGCCTGGACCCCTCTGGAGCCAAAATTGATCACAAGACTGGCTGATACGGTCAGGACCAAGGGCTTACGATCCCCGATCACTATGGCAGAAGTGGAAGCGCTTATGTCCTCCCCGCTGCTGCCGCATGACGTCACGAATCTAATGAGAGTTATTTTAGGACCTGCCCCATATGCCTTATGGATGGACGCTTGGGGAGTCCAACTACAGACGGTTATAGCGGCAGCCACTCGCGACCCCCGACACCCAGCGAACGGTCAAGGGCGGGGGGAACGGACTAACTTGGATCGTTTAAAGGGTTTGGCGGATGGAATGGCCGGCAATCCAGAGGGTCAGGCTGCATTATTAAGACCGGGGGAACTGGTTGCTATTACGGCGTCGGCTCTCCAGGCGTTTAGAGAGGTCGCTCGGTTGGCGGAACCCACAGACCCGTGGGCGGAAATTACGCAGGGACCATCTGAGTCCTTTGTGGATTTTGCCAATCGTCTTATAAAGGCGGTTGAAGGGTCAGATCTCCCACCTTCCGCGCGGGCTCCGGTGATCATTGACTGCTTTAGGCAGAAGTCACAGCCAGATATCCAGCAGCTTATACGGGCAGCACCCTCCACGCTGACCACCCCAGGAGAGATAATCAAATATGTGCTAGACAGGCAGAAGACTGCCCCTCTTACGGATCGAGGCATAGCCGCGGCCATGTCGTCTGCTATTCAGCCCTTAGTTATGGCAGTAGTCAATAGAGAGAGGGATGGACAAACTGGGTCGGGTGGTCGTGCCCGAGGGCTCTGCTACACTTGTGGATCCCCGGGACATTATCAGGCGCAGTGCCCGAAAAAACGAAAGTCAGGAAACAGCCGTGAGCGATGTCAGTTGTGTGACGGGATGGGACACAACGCTAAACAGTGCAGAAGGCGGGATGGCAACCAGGGCCAACGCCCAGGAAGAGGCCTCTCTTCGGGGCCGTGGCCCGTCTCTCAGCAGCCTGCCGTCTCGTTAGCGATGACAATGGAACATAAAGATCGCCCCTTGGTTAGGGTCATTCTGACTAACACTGGGAGTCATCCGGTCAAACAGCGTTCGGTGTATATCACCGCGCTGTTGGACTCTGGAGCGGACATCACTATTATTTCAGAGGAGGACTGGCCCACCGATTGGCCAGTGATGGAGGCCGCGAACCCGCAGATCCATGGGATAGAAGGGGGAATTCCCATGCGAAAATCCCGGGATATGATAGAGGTGGGGGTTATTTAACCGAGACGGGTCTTTGGAGCGACCCCTGCTCCTCTTCCCCGCAGTAGCTATGGTTAGAGGGAGTATCCTAGGAAGAGATTGTCTGCAGGGCCTAGGGCTCCGCTTGACAAATTTATAGGGAGGGCCACTGTTCTTACTGTTGCGCTACATCTGGCTATTCCGCTCAAATGGAAGCCAGACCACACGCCTGTGTGGATTGACCAGTGGCCCCTTCCTGAAGGTAAACTTGTAGCGCTAACGCAATTAGTGGAAAAAGAATTACAKTTAGGACATATAGAACCTTCACYTAGTTGTTGGAACACACCTGTCTTTGTGATCCGGAAGGCTTCCGGGTCTTATCGCTTATTGCATGACTTGCGCGCTGTTAACGCCAAGCTTGTTCCTTTTGGGGCCGTCCAACAGGGGGCGCCAGTTCTCTCCGCGCTCCCGCGTGGCTGGCCCCTGATGGTCCTAGACCTCAAGGATTGCTTCTTTTCTATTCCTCTTGCGGAACAAGATCGCGAAGCTTTTGCATTTACGCTCCCCTCTGTGAATAACCAGGCCCCCGCTCGAAGATTCCAATGGAAGGTCTTGCCCCAAGGGATGACCTGTTCTCCCACTATCTGTCAGTTGGTAGTGGGTCAGGTACTTGAGCCCTTGCGACTCAAGCACCCATCTCTGTGCATGTTGCATTATATGGATGATCTTTTGCTAGCCGCCTCAAGTCATGATGGGTTGGAAGCGGCAGGGGAGGAGGTTATCAGTACATTGGAAAGAGCCGGGTTCACCATTTCGCCTGATAAGATCCAGAGGGAGCCCGGAGTACAATATCTTGGGTACAAGTTAGGCAGTACGTATGTAGCACCCGTAGGCCTGGTAGCAGAACCCAGGATAGCCACCTTGTGGGATGTTCAAAAGCTGGTGGGGTCACTTCAGTGGCTTCGCCCAGCGTTAGGAATCCCGCCACGACTGATGGGCCCCTTTTATGAGCAGTTACGAGGGTCAGATCCTAACGAGGCGAGGGAATGGAATCTAGACATGAAAATGGCCTGGAGAGAGATCGTACAGCTTAGCACCACTGCTGCCTTGGAACGATGGGACCCTGCCCTGCCTCTGGAAGGAGCGGTCGCTAGATGTGAACAGGGGGCAATAGGGGTCCTGGGACAGGGACTGTCCACACACCCAAGGCCATGCTTGTGGTTATTCTCCACCCAACCCACCAAGGCGTTTACTGCTTGGTTAGAAGTGCTCACCCTTTTGATTACTAAGCTACGTGCTTCGGCAGTGCGAACCTTTGGCAAGGAGGTTGATATCCTCCTGTTGCCTGCATGCTTTCGGGAGGACCTTCCGCTCCCGGAGGGGATCCTGTTAGCCCTTAAGGGGTTTGCAGGAAAAATCAGGAGTAGTGACACGCCATCTATTTTTGACATTGCGCGTCCACTGCATGTTTCTCTGAAAGTGAGGGTTACCGACCACCCTGTACCGGGACCCACTGTCTTTACCGACGCCTCCTCAAGCACCCATAAGGGGGTGGTAGTCTGGAGGGGAGGGCCCCAAGGTGGGAGATAAAAGAAATAGCTGATTTGGGGGCAAGTGTACAACAACTGGAAAGCACGCGCTGTGGCCATGGCACTTCTGCTGTGGCCGACAACGCCCACTAATGTAGTGACTGACTCCGCGTTTGTTGCGAAAATGTTACTCAAGATGGGACAGGAGGGAGTCCCGTCTACAGCGGCGGCTTTTATTTTAGAGGATGCGTTAAGCCAAAGGTCAGCCATGGCCGCCGTTCTCCACGTGCGGAGTCATTCTGAAGTGCCAGGGTTTTTCACAGAAGGAAATGACGTGGCAGATAGCCAAGCCACCTTTCAAGCGTATCCCTTGAGAGAGGCTAAAGATCTTCATACTGCTCTCCATATTGGACCCCGCGCGCTATCCAAAGCGTGTAATATATCTATGCAGCAGGCTAGGGAGGTTGTTCAGACCTGCCCGCATTGTAATTCAGCCCCTGCGTTGGAGGCCGGGGTAAACCCTAGGGGTTTGGAACCCCTACAGATATGGCAGACAGACTTTACGCTTGAGCCTAGAATGGCCCCCCGTTCCTGGCTCGCTGTTACTGTGGATACCGCCTCATCGGCGATAGTCGTAACTCAGCATGGCCGTGTCACATCGGTTGCTGCACAACATCATTGGGCCACGGCTATCGCCGTTTTGGGAAGACCAAAGGCCATAAAAACAGATAACGGGTCCTGCTTCACGTCTAAATCCACGCGAGAGTGGCTCGCGAGATGGGGGATAGCACACACCACCGGGATTCCGGGTAATTCCCAGGGTCAAGCTATGGTAGAGCGGGCCAACCGGCTCCTGAAAGATAAGATCCGTGTGCTTGCGGAGGGGGACGGCTTTATGAAAAGAATCCCCACCAGCAAACAGGGGGAACTACTAGCCAAGGCAATGTATGCCCTCAATCACTTTGAGCGTGGTGAAAACACAAAAACACCGATACAAAAACACTGGAGACCTACCGTTCTTACAGAAGGACCCCCGGTTAAAATACGAATAGAGACAGGGGAGTGGGAAAAAGGATGGAACGTGCTGGTCTGGGGACGAGGTTATGCCGCTGTGAAAAACAGGGACACTGATAAGGTTATTTGGGTACCCTCTCGAAAAGTTAAACCGGACATCACCCAAAAGGATGAGGTGACTAAGAAAGATGAGGCGAGCCCTCTTTTTGCAGGCATTTCTGACTGGATACCCTGGGGAGACAAGCAAGAAGGACTCCAAGGAGAAACCGCTAGCAACAAGCAAGAAAGACCCGGAGAAGACACCCTTGCTGCCAACGAGAGTTAATTATATTCTCATTATTGGTGTCCTGGTCTTGTGTGAGGTTACGGGGGTAAGAGCTGATGTTCACTTACTCGAGCAGCCAGGGAACCTTTGGATTACATGGGCCAACCGTACAGGCCAAACGGATTTCTGCCTCTCTACACAGTCAGCCACCTCCCCTTTTCAAACATGTTTGATAGGTATCCCGTCCCCTATTTCCGAAGGTGATTTTAAGGGATACGTCTCTGATAATTGCACCACCTTGGGAACTGACCGGTTAGTCTCGTCAGCCAGCATTACCGGCGGCCCTGACAACAGCACCACCCTCACTTATCGAAAGGTTTCATGCTTGCTGTTAAAGCTGAATGTCTCTATGTGGGATGAGCCACCGGAACTACAGCTGCTAGGTTCCCAGTCTCTCCCTAACATTACTAATATTACTCAGATTTCTGGTGTAACTGGGGGATGCGTAGGCTTCACCCCACACTCCAATCCAAGTGGTGTTTACGGGTGGGACCGGAGACAGGTTACACACAACTTCTTGATCGCCCCGTGGGTCAATCCTTTCTTTAACAGCGCTTCTAACTCCACGGAACCGTTTACGGTGGTGACAGCGGATAGACACAATCTTTTTATGGGGAGTGAGTACTGCGGTGCATATGGCTACAGATTTTGGGAAATATATAATTGCTCACACAGATTTGATAATTTTGATATTTACACCTGTGGAGATGTGCAGACAGTCAAATCCCCCGAAAAACAGTGTGTGGGGGGAGGAGGTATATGGGTTAATCAATCAAAGGAAATTAATGAGACAGAGCCGTTCAGTTTTACTGCGAACTGTACAGCTAGTAATTTGGGTAATGTCAGCGGATGTTGTGGAAAAACGATCACGATTCTCCCATCAGGGGCGTGGATCGACAGCACACAAGGTAGTTTCACTAAACCAAAAGCGCTACCACCCGCAATTTTCCTCATTTGTGGGGATCGCGCATGGCAAGGAATTCCCAGTCGTCCGGTAGGGGGCCCCTGCTATTTAGGCAAGCTTACCATGTTAGCACCCAACCATACAGATATTCTCAAGGTGCTTGCCAATTCATCGCGGACAGGTATAAGACGTAAACGAAGCACCTCACACCTGGATGATACATGCTCAGATGAAGTGCAGCTTTGGGGTCCTACAGCAAGAATCTTTGCATCTATCTTAGCCCCGGGGGTAGCAGCTGCGCAAGCCTTAAGAGAAATCGAGAGACTAGCCTGTTGGTCCGTTAAACAGGCTAACTTGACAACATCACTCCTCGGGGACTTATTGGATGATGTCACGAGTATTCGACACGCGGTCCTGCAGAACCGAGCGGCTATTGACTTCTTGCTTCTAGCTCACGGCCATGGCTGTGAGGACGTTGCCGGAATGTGTTGTTTCAATCTGAGTGATCACAGTGAGTCTATACAGAAGAAGTTCCAGCTAATGAAGGAACATGTCAATAAGATCGGCGTGGACAGCGACCCAATCGGAAGTTGGCTGCGAGGATTATTCGAGGGAATAGGGGAATGGGCCGTTCATTTGCTGAAAGGACTGCTTTTGGGGCTTGTAGTTATCTTGTTGCTAGTAGTGTGCCTGCCTTGCCTTTTGCAATTTGTGTCCAGTAGCATCCGAAAGATGATTAATAATTCAATCAGCTATCACACGGAATATAAGAAGTTGCAAAAGGCTTGTAGGCAGCCCGAAAATGGAGCAGTGTAAAGCAGTACGTGGGTGGTGGTATGAAACTTGCGAATCGGGCTGTAACGGGGCAAGGCTTGACTGAGGGGACCATAGTATGTATAGGCGAAAGGCGGGGCTTCGGTTGTACGCGGTTAGGAGTCCCCTCAGGATATAGTAGTTGCGCTTTTGCATAGGGAGGGGGAAATGTAGTCAAATAGAGCCAGAGGCAACTTGAATAGTCTAAAGACCAAATAAGGAAAAAGCAAGACATTCCATATGCTCATTGGTGGCAACTAGATAAGGAAGGAATGACGCAAGGACATATGGGCGTAGACGAAGCTATGCACGATTATATAAGCTGTTGCCACCATCAAATAAACGCCATTTTACCATTCACCACATTGGTGTGCACCTGGGTAGATGGACAGACCGTTGAGTCCCTAACGATTGCGAACACCTGAATGAAGCTGAAGGCTTCAACACTG
>ALVE-NSAC1_negative_4838
TGGCTATTCCGCTCAAATGGAAGCCAGACCACACGCCTGTGTGGATTGACCAGTGGCCCCTTCCTGAAGGTAAACTTGTAGCGCTAACGCAATTAGTGGAAAAAGAATTACAGTTAGGACATATAGAACCTTCACTTAGTTGTTGGAACACACCTGTCTTTGTGATCCGGAAGGCTTCCGGGTCTTATCGCTTATTGCATGACTTGCGCGCTGTTAACGCCAAGCTTGTTCCTTTTGGGGCCGTCCAACAGGGGGCGCCAGTTCTCTCCGCGCTCCCGCGTGGCTGGCCCCTGATGGTCCTAGACCTCAAGGATTGCTTCTTTTCTATTCCTCTTGCGGAACAAGATCGCGAAGCTTTTGCATTTACGCTCCCCTCTGTGAATAACCAGGCCCCCGCTCGAAGATTCCAATGGAAGGTCTTGCCCCAAGGGATGACCTGTTCTCCCACTATCTGTCAGTTGGTAGTGGGTCAGGTACTTGAGCCCTTGCGACTCAAGCACCCATCTCTGTGCATGTTGCATTATATGGATGATCTTTTGCTAGCCGCCTCAAGTCATGATGGGTTGGAAGCGGCAGGGGAGGAGGTTATCAGTACATTGGAAAGAGCCGGGTTCACCATTTCGCCTGATAAGATCCAGAGGGAGCCCGGAGTACAATATCTTGGGTACAAGTTAGGCAGTACGTATGTAGCACCCGTAGGCCTGGTAGCAGAACCCAGGATAGCCACCTTGTGGGATGTTCAAAAGCTGGTGGGGTCACTTCAGTGGCTTCGCCCAGCGTTAGGAATCCCGCCACGACTGATGGGCCCCTTTTATGAGCAGTTACGAGGGTCAGATCCTAACGAGGCGAGGGAATGGAATCTAGACATGAAAATGGCCTGGAGAGAGATCGTACAGCTTAGCACCACTGCTGCCTTGGAACGATGGGACCCTGCCCTGCCTCTGGAAGGAGCGGTCGCTAGATGTGAACAGGGGGCAATAGGGGTCCTGGGACAGGGACTGTCCACACACCCAAGGCCATGTTTGTGGTTATTCTCCACCCAACCCACCAAGGCGTTTACTGCTTGGTTAGAAGTGCTCACCCTTTTGATTACTAAGCTACGTGCTTCGGCAGTGCGAACCTTTGGCAAGGAGGTTGATATCCTCCTGTTGCCTGCATGCTTTCGGGAGGACCTTCCGCTCCCGGAGGGGATCCTGTTAGCCCTTAAGGGGTTTGCAGGAAAAATCAGGAGTAGTGACACGCCATCTATTTTTGACATTGCGCGTCCACTGCATGTTTCTCTGAAAGTGAGGGTTACCGACCACCCTGTACCGGGACCCACTGTCTTTACCGACGCCTCCTCAAGCACCCATAAGGGGGTGGTAGTCTGGAGGGAGGGCCCAAGGTGGGAGATAAAAGAAATAGCTGATTTGGGGGCAAGTGTACAACAACTGGAAGCACGCGCTGTGGCCATGGCACTTCTGCTGTGGCCGACAACGCCCACTAATGTAGTGACTGACTCCGCGTTTGTTGCGAAAATGTTACTCAAGATGGGACAGGAGGGAGTCCCGTCTACAGCGGCGGCTTTTATTTTAGAGGATGCGTTAAGCCAAAGGTCAGCCATGGCCGCCGTTCTCCACGTGCGGAGTCATTCTGAAGTGCCAGGGTTTTTCACAGAAGGAAATGACGTGGCAGATAGCCAAGCCACCTTTCAAGCGTATCCCTTGAGAGAGGCTAAAGATCTTCATACTGCTCTCCATATTGGACCCCGCGCGCTATCCAAAGCGTGTAATATATCTATGCAGCAGGCTAGGGAGGTTGTTCAGACCTGCCCGCATTGTAATTCAGCCCCTGCGTTGGAGGCCGGGGTAAACCCTAGGGGTTTGGGACCCCTACAGATATGGCAGACAGACTTTACGCTTGAGCCTAGAATGGCCCCCCGTTCCTGGCTCGCTGTTACTGTGGATACCGCCTCATCGGCGATAGTCGTAACTCAGCATGGCCGTGTCACATCGGTTGCTGCACAACATCATTGGGCCACGGCTATCGCCGTTTTGGGAAGACCAAAGGCCATAAAAACAGATAACGGGTCCTGCTTCACGTCTAAATCCACGCGAGGGTGGCTCGCGAGATGGGGGATAGCACACACCACCGGGATTCCGGGTAATTCCCAGGGTCAAGCTATGGTAGAGCGGGCCAACCGGCTCCTGAAAGATAAGATCCGTGTGCTTGCGGAGGGGGACGGCTTTATGAAAAGAATCCCCACCAGCAAACAGGGGGAACTACTAGCCAAGGCAATGTATGCCCTCAATCACTTTGAGCGTGGTGAAAACACAAAAACACCGATACAAAAACACTGGAGACCTACCGTTCTTACAGAAGGACCCCCGGTTAAAATACGAATAGAGACAGGGGAGTGGGAAAAAGGATGGAACGTGCTGGTCTGGGGACGAGGTTATGCCGCTGTGAAAAACAGGGACACTGATAAGGTTATTTGGGTACCCTCTCGAAAAGTTAAACCGGACATCACCCAAAAGGATGAGGTGACTAAGAAAGATGAGGCGAGCCCTCTTTTTGCAGGCATTTCTGACTGGATACCCTGGGGAGACAAGCAAGAAGGACTCCAAGGAGAAACCGCTAGCAACAAGCAAGAAAGACCCGGAGAAGACACCCTTGCTGCCAACGAGAGTTAACTATATTCTCATTATTGGTGTCCTGGTCTTGTGTGAGGTTACGGGGGTAAGAGCTGATGTTCACTTACTCGAGCAGCCAGGGAACCTTTGGATTACATGGGCCAACCGTACAGGCCAAACGGATTTCTGCCTCTCTACACAGTCAGCCACCTCCCCTTTTCAAACATGTTTGATAGGTATCCCGTCCCCTATTTCCGAAGGTGATTTTAAGGGATACGTCTCTGATAATTGCACCACCTTGGGAACTGACCGGTTAGTCTCGTCAGCCAGCATTACCGGCGGCCCTGACAACAGCACCACCCTCACTTATCGAAAGGTTTCATGCTTGCTGTTAAAGCTGAATGTCTCTATGTGGGATGAGCCACCGGAACTACAGCTGCTAGGTTCCCAGTCTCTCCCTAACATTACTAATATTACTCAGATTTCTGGTGTAACTGGGGGATGCGTAGGCTTCACCCCACACTCCAATCCAAGTGGTGTTTACGGGTGGGGCCGGAGACAGGTTACACACAACCTTTTGATCGCCCCGTGGGTCAATCCTTTCTTTAACAGCGCTTCTAACTCCACGGAACCGTTTACGGTGGTGACAGCGGATAGACACAATCTTTTTATGGGGAGTGAGTACTGCGGTGCATATGGCTACAGATTTTGGGAAATATATAATTGCTCACACAGATTTGATAATTTTGATATTTACACCTGTGGAGATGTGCAGACAGTCAAATCCCCCGAAAAACAGTGTGTGGGGGGAGGAGGTATATGGGTTAATCAATCAAAGGAAATTAACGAGACAGAGCCGTTCAGTTTTACTGCGAACTGTACAGCTAGTAATTTGGGTAATGTCAGCGGATGTTGTGGAAAAACGATCACGATTCTCCCATCAGGGGCGTGGATCGACAGCACACAAGGTAGTTTCACTAAACCAAAAGCGCTACCACCCGCAATTTTCCTCATTTGTGGGGATCGCGCATGGCAAGGAATTCCCAGTCGTCCGGTAGGGGGCCCCTGCTATTTAGGCAAGCTTACCATGTTAGCACCCAACCATACAGATATTCTCAAGGTGCTTGCCAATTCATCGCGGACAGGTATAAGACGTAAACGAAGCACCTCACACCTGGATGATACATGCTCAGATGAAGTGCAGCTTTGGGGTCCTACAGCAAGAATCTTTGCATCTATCTTAGCCCCGGGGGTAGCAGCTGCGCAAGCCTTAAGAGAAATCGAGAGACTAGCCTGTTGGTCCGTTAAACAGGCTAACTTGACAACATCACTCCTCGGGGACTTATTGGATGATGTCACGAGTATTCGACACGCGGTCCTGCAGAACCGAGCGGCTATTGACTTCTTGCTTCTAGCTCACGGCCATGGCTGTGAGGACGTTGCCGGAATGTGTTGTTTCAATCTGAGTGATCACAGTGAGTCTATACAGAAGAAGTTCCAGCTAATGAAGGAACATGTCAATAAGATCGGCGTGGACAGCGACCCAATCGGAAGTTGGCTGCGAGGATTATTCGAGGGAATAGGGGAATGGGCCGTTCATTTGCTGAAAGGACTGCTTTTGGGGCTTGTAGTTATCTTGTTGCTAGTAGTGTGCCTGCCTTGCCTTTTGCAATTTGTGTCCAGTAGCATCCGAAAGATGATTAATAATTCAATCAGCTATCACGCGGAATATAAGAAGTTGCAAAAGGCTTGTAGGCAGCCCGAAAATGGAGCAGTGTAAAGCAGTACGTGGGTGGTGGTATGAAACTTGCGAATCGGGCTGTAACGGGGCAAGGCTTGACTGAGGGGACCATAGTATGTATAGGCGAAAGGCGGGGCTTCGGTTGTACGCGGTTAGGAGTCCCCTCAGGATATAGTAGTTGCGCTTTTGCATAGGGAGGGGGAAATGTAGTCAAATAGAGCCAGAGGCAACTTGAATAGTCTAAAGACCAAATAAGGAAAAAGCAAGACATTCCATATGCTCATTGGTGGCAACTAGATAAGGAAGGAATGACGCAAGGACATATGGGCGTAGACGAAGCTATGCACGATTATATAAGCTGTTGCCACCATCAAATAAACGCCATTTTACCATTCACCACATTGGTGTGCACCTGGGTAGATGGACAGACCGTTGAGTCCCTAACGATTGCGAACACCTGAATGAAGCTGAAGGCTTCAAACAGG
>ALVE-NSAC7_negative_7531_MT263509
TGTAGTCAAATAGAGCCAGAGGCAACTTGAATAGTCTAAAGACCAAATAAGGAAAAAGCAAGACATTCCGTATGCTCATTGGTGGCAACTAGATAAGGAAGGAATGACGCAAGGACATATGGGCGTAGACGAAGCTATGCACGATTATATAAGCTGTTGCCACCATCAAATAAACGCCATTTTACCATTCACCACATTGGTGTGCACCTGGGTAGATGGACAGACCGTTGAGTCCCTAACGATTGCGAACACCTGAATGAAGCAGAAGGCTTCATTTGGTGACCCCGACGTGATCGTTAGGGAATAGTGGTCGGCCACAGGCGGCGTGGCGATCCTGCCCTCATCCGTCTCGCTTAACGGAGCGAGGACGATGACCCTAGTAGAGGGGGCTGCGGCTTAGGAGGGCAGAAGCTGAGTGACGTCGGAGGGAGCTCCACGGCCGGGGGCCAAGATAACCTACCGAGAACTCAGAGAGTCGTTGGAAGACGGGAAGGAAGCCCGACGACTGAGCAGTCCACCCCAGGCGCGATTCCGGTCGCCCGGTGGATCAAGCATGGAAGCCGTCATAAAGGTGATTTCGTCCGCGTGTAAAACCTATTGCGGGAAAACCTCTCCTTCTAAGAAGGAAATAGGGGCCATGTTGTCCCTGTTACAAAAGGAAGGGTTGCTTATGTCCCCCTCAGACTTATATTCCCCGGGGTCCTGGGATCCCATTACCGCGGCACTCACCCAGCGGGCAATGGTACTTGGGAAATCGGGAGAGTTAAAAACCTGGGGATTGGTTTTGGGGGCATTGAAGGCGGCTCGAGAGGAACAGGTTACATCTGAGCAAGCAAAGTTTTGGTTGGGATTAGGGGGAGGGAGGGTCTCTCCCCCAGGTCCGGAGTGCATCGAGAAACCAGCAACGGAGCGGCGAATCGACAAAGGGGAGGAAGTGGGAGAAACAACTGCGCAGCGAGATGCGAAGATGGCGCCGGAGAAAATGGCCACACCTAAAACCGTTGGCACATCCTGCTATCAGTGCGGAACAGCTACTGGCTGTAATTGCGCCACAGCCTCGGCCCCTCCTCCTCCTTATGTGGGGAGTGGTTTGTATCCTTCCCTGTTCGGGGGTGGGAGAGCAGCAGGGCCAGGGGGGTGACACACCTCGGGGGGCGGAACAGCCAAGGGCGGAGCCAGGGCACGCGGGTCAGGCCCCTGGGCCGGCCCTGACTGACTGGGCAAGGATCAGGGAGGAGCTTGCGAGTACAGGTCCGCCTGTGGTGGCCATGCCTGTAGTGATTAAGACAGAGGGACCCGCCTGGACCCCTCTGGAGCCAAAATTGATCACAAGACTGGCTGATTCGGTCAGGACCAAGGGCTTACGATCCCCGATCACTATGGCATAATTGGAAGCGCTTATGTCCTCCCCGCTGCTGCCGTTTGATGTCTCGAATCTAATGAGAGTTATTTTAGGACCTGCCCCATATGCCTTATGGATGGACGCTTGGGGAGTCCAACTACAGACGGTTATAGCGGCAGCCACTCGCGACCCCCGACACCCAGCGAACGGTCAAGGGCGGGGGGAACGGACTAACTTGGATCGTTTAAAGGGTTTGGCGGATGGAATGGCCGGCAATCCAGAGGGTCAGGCTGCATTATTAAGACCGGGGGAACTGGTTGCTATTACGGCGTCGGCTCTCCAGGCGTTTAGAGAGGTCGCTCGGTTGGCGGAACCCACAGACCCGTGGGCGGAAATTACGCAGGGACCATCTGAGTCCTTTGTGGATTTTGCCAATCGTCTTATAAAGGCGGTTGAAGGGTCAGATCTCCCACCTTCCGCGCGGGCTCCGGTGATCATTGACTGCTTTAGGCAGAAGTCACAGCCAGATATCCAGCAGCTTATACGGGCAGCACCCTCCACGCTGACCACCCCAGGAGAGATAATCAAATATGTGCTAGACAGGCAGAAGACTGCCCCTCTTACGGATCGAGGCATAGCCGCGGCCATGTCGTCTGCTATTCAGCCCTTAGTTATGGCAGTAGTCAATAGAGAGAGGGATGGACAAACTGGGTCGGGTGGTCGTGCCCGAGGGCTCTGCTACACTTGTGGATCCCCGGGACATTATCAGGCGCAGTGCCCGAAAAAACGAAAGTCAGGAAACAGCCGTGAGCGATGTCAGCTGTGTGACGGGATGGGACACAACGCTAAACAGTGCAGAAGGCGGGATGGCAACCAGGGCCAACGCCCAGGAAGAGGCCTCTCTTCGGGGCCGTGGCCCGTCTCTCAGCAGCCTGCCGTCTCGTTAGCGATGACAATGGAACATAAAGATCGCCCCTTGGTTAGGGTCATTCTGACTAACACTGGGAGTCATCCGGTCAAACAGCGTTCGGTGTATATCACCGCGCTGTTGGACTCTGGAGCGGACATCACTATTATTTCAGAGGAGGACTGGCCCACCGATTGGCCAGTGATGGAGGCCGCGAACCCGCAGATCCATGGGATAGGAGGGGGAATTCCCATGCGAAAATCCCGGGATATGATAGAGGTGGGGGTTATTAACCGAGACGGGTCTTTGGAGCGACCCCTGCTCCTCTTCCCCGCAGTAGCTATGGTTAGAGGGAGTATCCTAGGAAGAGATTGTCTGCAGGGCCTAGGGCTCCGCTTGACAAATTTATAGGGAGGGCCACTGTTCTTACTGTTGCGCTACATCTGGCTATTCCGCTCAAATGGAAGCCAGACCACACGCCTGTGTGGATTGACCAGTGGCCCCTTCCTGAAGGTAAACTTGTAGCGCTAACGCAATTAGTGGAAAAAGAATTACAGTTAGGACATATAGAACCTTCACTTAGTTGTTGGAACACACCTGTCTTTGTGATCCGGAAGGCTTCCGGGTCTTATCGCTTATTGCATGACTTGCGCGCTGTTAACGCCAAGCTTGTTCCTTTTGGGGCCGTCCAACAGGGGGCGCCAGTTCTCTCCGCGCTCCCGCGTGGCTGGCCCCTGATGGTCCTAGACCTCAAGGATTGCTTCTTTTCTATTCCTCTTGCGGAACAAGATCGCGAAGCTTTTGCATTTACGCTCCCCTCTGTGAATAACCAGGCCCCCGCTCGAAGATTCCAATGGAAGGTCTTGCCCCAAGGGATGACCTGTTCTCCCACTATCTGTCAGTTGGTAGTGGGTCAGGTACTTGAGCCCTTGCGACTCAAGCACCCATCTCTGTGCATGTTGCATTATATGGATGATCTTTTGCTAGCCGCCTCAAGTCATGATGGGTTGGAAGCGGCAGGGGAGGAGGTTATCAGTACATTGGAAAGAGCCGGGTTCACCATTTCGCCTGATAAGATCCAGAGGGAGCCCGGAGTACAATATCTTGGGTACAAGTTAGGCAGTACGTATGTAGCACCCGTAGGCCTGGTAGCAGAACCCAGGATAGCCACCTTGTGGGATGTTCAAAAGCTGGTGGGGTCACTTCAGTGGCTTCGCCCAGCGTTAGGAATCCCGCCACGACTGATGGGCCCCTTTTATGAGCAGTTACGAGGGTCAGATCCTAACGAGGCGAGGGAATGGAATCTAGACATGAAAATGGCCTGGAGAGAGATCGTACAGCTTAGCACCACTGCTGCCTTGGAACGATGGGACCCTGCCCTGCCTCTGGAAGGAGCGGTCGCTAGATGTGAACAGGGGGCAATAGGGGTCCTGGGACAGGGACTGTCCACACACCCAAGGCCATGTTTGTGGTTATTCTCCACCCAACCCACCAAGGCGTTTACTGCTTGGTTAGAAGTGCTCACCCTTTTGATTACTAAGCTACGTGCTTCGGCAGTGCGAACCTTTGGCAAGGAGGTTGATATCCTCCTGTTGCCTGCATGCTTTCGGGAGGACCTTCCGCTCCCGGAGGGGATCCTGTTAGCCCTTAAGGGGTTTGCAGGAAAAATCAGGAGTAGTGACACGCCATCTATTTTTGACATTGCGCGTCCACTGCATGTTTCTCTGAAAGTGAGGGTTACCGACCACCCTGTACCGGGACCCACTGTCTTTACCGACGCCTCCTCAAACACCCATAAGGGGGTGGTAGTCTGGAGGGAGGGCCCAAGGTGGGAGATAAAAGAAATAGCTGATTTGGGGGCAAGTGTACAACAACTGGAAGCACGCGCTGTGGCCATGGCACTTCTGCTGTGGCCGACAACGCCCACTAATGTAGTGACTGACTCCGCGTTTGTTGCGAAAATGTTACTCAAGATGGGACAGGAGGGAGTCCCGTCTACAGCGGCGGCTTTTATTTTAGAGGATGCGTTAAGCCAAAGGTCAGCCATGGCCGCCGTTCTCCACGTGCGGAGTCATTCTGAAGTGCCAGGGTTTTTCACAGAAGGAAATGACGTGGCAGATAGCCAAGCCACCTTTCAAGCGTATCCCTTGAGAGAGGCTAAAGATCTTCATACTGCTCTCCATATTGGACCCCGCGCGCTATCCAAAGCGTGTAATATATCTATGCAGCAGGCTAGGGAGGTTGTTCAGACCTGCCCGCATTGTAATTCAGCCCCTGCGTTGGAGGCCGGGGTAAACCCTAGGGGTTTGGGACCCCTACAGATATGGCAGACAGACTTTACGCTTGAGCCTAGAATGGCCCCCCGTTCCTGGCTCGCTGTTACTGTGGATACCGCCTCATCGGCGATAGTCGTAACTCAGCATGGCCGTGTCACATCGGTTGCTGCACAACATCATTGGGCCACGGCTATCGCCGTTTTGGGAAGACCAAAGGCCATAAAAACAGATAACGGGTCCTGCTTCACGTCTAAATCCACGCGAGAGTGGCTCGCGAGATGGGGGATAGCACACACCACCGGGATTCCGGGTAATTCCCAGGGTCAAGCTATGGTAGAGCGGGCCAACCGGCTCCTGAAAGATAAGATCCGTGTGCTTGCGGAGGGGGACGGCTTTATGAAAAGAATCCCCACCAGCAAACAGGGGGAACTATTAGCCAAGGCAATGTATGCCCTCAATCACTTTGAGCGTGGTGAAAACACAAAAACACCGATACAAAAACACTGGAGACCTACCGTTCTTACAGAAGGACCCCCGGTTAAAATACGAATAGAGACAGGGGAGTGGGAAAAAGGATGGAACGTGCTGGTCTGGGGACGAGGTTATGCCGCTGTGAAAAACAGGGACACTGATAAGGTTATTTGGGTACCCTCTCGAAAAGTTAAACCGGACATCACCCAAAAGGATGAGGTGACTAAGAAAGATGAGGCGAGCCCTCTTTTTGCAGGCATTTCTGACTGGATACCCTGGGGAGACAAGCAAGAAGGACTCCAAGGAGAAACCGCTAGCAACAAGCAAGAAAGACCCGGAGAAGACACCCTTGCTGCCAACGAGAGTTAATTATATTCTCATTATTGGTGTCCTGGTCTTGTGTGAGGTTACGGGGGTAAGAGCTGATGTTCACTTACTCGAGCAGCCAGGGAACCTTTGGATTACATGGGCCAACCGTACAGGCCAAACGGATTTCTGCCTCTCTACACAGTCAGCCACCTCCCCTTTTCAAACATGTTTGATAGGTATCCCGTCCCCTATTTCCGAAGGTGATTTTAAGGGATACGTCTCTGATAATTGCACCACCTTGGGAACTGACCGGTTAGTCTCGTCAGCCAGCATTACCGGCGGCCCTGACAACAGCACCACCCTCACTTATCGAAAGGTTTCATGCTTGCTGTTAAAGCTGAATGTCTCTATGTGGGATGAGCCACCGGAACTACAGCTGCTAGGTTCCCAGTCTCTCCCTAACATTACTAATATTACTCAGATTTCTGGTGTAACTGGGGGATGCGTAGGCTTCACCCCACACTCCAATCCAAGTGGTGTTTACGGGTGGGGCCGGAGACAGGTTACACACAACTTCTTGATCGCCCCGTGGGTCAATCCTTTCTTTAACAGCGCTTCTAACTCCACGGAACCGTTTACGGTGGTGACAGCGGATAGACACAATCTTTTTATGGGGAGTGAGTACTGCGGTGCATATGGCTACAGATTTTGGGAAATATATAATTGCTCACACAGATTTGATAATTTTGATATTTACACCTGTGGAGATGTGCAGACAGTCAAATCCCCCGAAAAACAGTGTGTGGGGGGAGGAGGTATATGGGTTAATCAATCAAAGGAAATTAATGAGACAGAGCCGTTCAGTTTTACTGCGAACTGTACAGCTAGTAATTTGGGTAATGTCAGCGGATGTTGTGGAAAAACGATCACGATTCTCCCATCAGGGGCGTGGATCGACAGCACACAAGGTAGTTTCACTAAACCAAAAGCGCTACCACCCGCAATTTTCCTCATTTGTGGGGATCGCGCATGGCAAGGAATTCCCAGTCGTCCGGTAGGGGGCCCCTGCTATTTAGGCAAGCTTACCATGTTAGCACCCAACCATACAGATATTCTCAAGGTGCTTGCCAATTCATCGCGGACAGGTATAAGACGTAAACGAAGCACCTCACACCTGGATGATACATGCTCAGATGAAGTGCAGCTTTGGGGTCCTACAGCAAGAATCTTTGCATCTATCTTAGCCCCGGGGGTAGCAGCTGCGCAAGCCTTAAGAGAAATCGAGAGACTAGCCTGTTGGTCCGTTAAACAGGCTAACTTGACAACATCACTCCTCGGGGACTTATTGGATGATGTCACGAGTATTCGACACGCGGTCCTGCAGAACCGAGCGGCTATTGACTTCTTGCTTCTAGCTCACGGCCATGGCTGTGTGGACGTTGCCGGAATGTGTTGTTTCAATCTGAGTGATCACAGTGAGTCTATACAGAAGAAGTTCCAGCTAATGAAGGAACATGTCAATAAGATCGGCGTGGACAGCGACCCAATCGGAAGTTGGCTGCGAGGATTATTCGAGGGAATAGGGGAATGGGCCGTTCATTTGCTGAAAGGACTGCTTTTGGGGCTTGTAGTTATCTTGTTGCTAGTAGTGTGCCTGCCTTGCCTTTTGCAAATTGTGTCCAGTAGCATCCGAAAGATGATTAATAATTCAATCAGCTATCACACGGAATATAAGAAGTTGCAAAAGGCTTGTAGGCAGCCCGAAAATGGAGCAGTGTAAAGCAGTACGTGGGTGGTGGTATGAAACTTGCGAATCGGGCTGTAACGGGGCAAGGCTTGACTGAGGGGACCATAGTATGTATAGGCGAAAGGCGGGGCTTCGGTTGTACGCGGTTAGGAGTCCCCTCAGGATATAGTAGTTGCGCTTTTGCATAGGGAGGGGGAAATGTAGTCAAATAGAGCCAGAGGCAACTTGAATAGTCTAAAGACCAAATAAGGAAAAAGCAAGACATTCCGTATGCTCATTGGTGGCAACTAGATAAGGAAGGAATGACGCAAGGACATATGGGCGTAGACGAAGCTATGCACGATTATATAAGCTGTTGCCACCATCAAATAAACGCCATTTTACCATTCACCACATTGGTGTGCACCTGGGTAGATGGACAGACCGTTGAGTCCCTAACGATTGCGAACACCTGAATGAAGCAGAAGGCTTCAGAGAAG
>ALVE_ros001_positive_7531_MT263510
TGTAGTCAAATAGAGCCAGAGGCAACTTGAATAGCCTAAAGACCAAATAAGGAAAAAGCAAGACATTCCATATGCTCATTGGTGGCAACTAGATAAGGAAGGAATGACGCAAGGACATATGGGCGTAGACGAAGCTATGCACGATTATATAAGCTGTTGCCACCATCAAATAAACGCCATTTTACCATTCACCACATTGGTGTGCACCTGGGTAGATGGACAGACCGTTGAGTCCCTAACGATTGCGAACACCTGAATGAAGCTGAAGGCTTCATTTGGTGACCCCGACGTGATCGTTAGGGAATAGTGGTCGGCCACAGGCGGCGTGGCGATCCTGCCCTCATCCGTCTCGCTTAACGGAGCGAGGACGATGACCCTAGTAGAGGGGGCTGCGGCTTAGGAGGGCAGAAGCTGAGTGACGTCGGAGGGAGCTCCACGGCCGGGGGCCAAGATAACCTACCGAGAACTCAGAGAGTCGTTGGAAGACGGGAAGGAAGCCCGACGACTGAGCAGTCCACCCCAGGCGCGATTCTGGTCGCCCGGTGGGATCAAGCATGGAAGCCGTCATAAAGGTGATTTCGTCCGCGTGTAAAACCTATTGCGGGAAAACCTCTCCTTCTAAGAAGGAAATAGGGGCCATGTTGTCCCTGTTACAAAAGGAAGGGTTGCTTATGTCCCCCTCAGACTTATATTCCCCGGGGTCCTGGGATCCCATTACCGCGGCACTCACCCAGCGGGCAATGGTACTTGGGAAATCGGAGAGTTAAAAACCTGGGGATTGGTTTTGGGGGCATTGAAGGCGGCTCGAGAGGAACAGGTTACATCTGAGCAAGCAAAGTTTTGGTTGGGATTAGGGGGAGGGAGGGTCTCTCCCCCAGGTCCGGAGTGCATCGAGAAACCAGCAACGGAGCGGCGAATCGACAAAGGGGAGGAAGTGGGAGAAACAACTGCGCAGCGAGATGCGAAGATGGCGCCGGAGAAAATGGCCACACCTAAAACCGTTGGCACATCCTGCTATCAGTGCGGAACAGCTACTGGCTGTAATTGCGCCACAGCCTCGGCCCCTCCTCCTCCTTATGTGGGGAGTGGTTTGTATCCTTCCCTGTTTGGGGGTGGGAGAGCAGCAGGGCCAGGGGGGTGACACACCTCGGGGGGCGGAACAGCCAAGGGCGGAGCCAGGGCACGCGGGTCAGGCCCCTGGGCCGGCCCTGACTGACTGGGCAAGGATCAGGGAGGAGCTTGCGAGTACAGGTCCGCCCGTGGTGGCCATGCCTGTAGTGATTAAGACAGAGGGACCCGCCTGGACCCCTCTGGAGCCAAAATTGATCACAAGACTGGCTGATACGGTCAGGACCAAGGGCTTACGTTCCCCGATCACTATGGCAGAAGTGGAAGCGCTTATGTCCTCCCCGCTGCTGCCGCATGACGCCACTAATCTAATGAGAGTCATTTTATGACCTGCCCCATATTCCTTATGGATGTACGCTTGGGGAGTCCAACTTCACACGGTTATATTGGTAGTCACTCTCCACCCCCGACACCCAGCGAACGGTCAAGGGCGGGGGGAACGGACTAACTTGGATCGTTTAAAGGGTTTGGCGGATGGAATGGCCGGCAATCCAGAGGGTCAGGCTGCGTTATTAAGACCGGGGGAACTGGTTGCTATTACGGCGTCGGCTCTCCAGGCGTTTAGAGAGGTCGCTCGGTTGGCGGAACCCACAGACCCGTGGGCGGAAATTACGCAGGGACCATCTGAGTCCTTTGTGGATTTTGCCAATCGTCTTATAAAGGCGGTTGAAGGGTCAGATCTCCCACCTTCCGCGCGGGCTCCGGTGATCATTGACTGCTTTAGGCAGAAGTCACAGCCAGATATCCAGCAGCTTATACGGGCAGCACCCTCCACGCTGACCACCCCAGGAGAGATAATCAAATATGTGCTAGACAGGCAGAAGACTGCCCCTCTTACGGATCGAGGCATAGCCGCGGCCATGTCGTCTGCTATTCAGCCCTTAGTTATGGCAGTAGTCAATAGAGAGAGGGATGGACAAACTGGGTCGGGTGGTCGTGCCCGAGGGCTCTGCTACACTTGTGGATCCCCGGGACATTATCAGGCGCAGTGCCCGAAAAAACGAAAGTCAGGAAACAGCCGTGAGCGATGTCAGCTGTGTGACGGGATGGGACACAACGCTAAACAGTGCAGAAGGCGGGATGGCAACCAGGGCCAACGCCCAGGAAGAGGCCTCTCTTCGGGGCCGTGGCCCGTCTCTCAGCAGCCTGCCGTCTCGTTAGCGATGACAATGGAACATAAAGATCGCCCCTTGGTTAGGGTCATTCTGACTAACACTGGGAGTCATCCGGTCAAACAGCGTTCGGTGTATATCACCGCGCTGTTGGACTCTGGAGCGGACATCACTATTATTTCAGAGGAGGATTGGCCCACCGATTGGCCAGTGATGGAGGCCGCGAACCCGCAGATCCATGGGATAGGAGGGGGAATTCCCATGCGAAAATCCCGGGATATGATAGAGGTGGGGGTTATTAACCGAGACGGGTCTTTGGAGCGACCCCTGCTCCTCTTCCCCGCAGTAGCTATGGTTAGAGGGAGTATCCTAGGAAGAGATTGTCTGCAGGGCCTAGGGCTCCGCTTGACAAATTTATAGGGAGGGCCACTGTTCTTACTGTTGCGCTACATCTGGCTATTCCGCTCAAATGGAAGCCAGACCACACGCCTGTGTGGATTGACCAGTGGCCCCTTCCTGAAGGTAAACTTGTAGCGCTAACGCAATTAGTGGAAAAAGAATTACAGTTAGGACATATAGAACCTTCACTTAGTTGTTGGAACACACCTGTCTTTGTGATCCGGAAGGCTTCCGGGTCTTATCGCTTATTGCATGACTTGCGCGCTGTTAACGCCAAGCTTGTTCCTTTTGGGGCCGTCCAACAGGGGGCGCCAGTTCTCTCCGCGCTCCCGCGTGGCTGGCCCCTGATGGTCCTAGACCTCAAGGATTGCTTCTTTTCTATTCCTCTTGCGGAACAAGATCGCGAAGCTTTTGCATTTACGCTCCCCTCTGTGAATAACCAGGCCCCCGCTCGAAGATTCCAATGGAAGGTCTTGCCCCAAGGGATGACCTGTTCTCCCACTATCTGTCAGTTGGTAGTGGGTCAGGTACTTGAGCCCTTGCGACTCAAGCACCCATCTCTGTGCATGTTGCATTATATGGATGATCTTTTGCTAGCCGCCTCAAGTCATGATGGGTTGGAAGCGGCAGGGGAGGAGGTTATCAGTACATTGGAAAGAGCCGGGTTCACCATTTCGCCTGATAAGATCCAGAGGGAGCCCGGAGTACAATATCTTGGGTACAAGTTAGGCAGTACGTATGTAGCACCCGTAGGCCTGGTAGCAGAACCCAGGATAGCCACCTTGTGGGATGTTCAAAAGCTGGTGGGGTCACTTCAGTGGCTTCGCCCAGCGTTAGGAATCCCGCCACGACTGATGGGCCCCTTTTATGAGCAGTTACGAGGGTCAGATCCTAACGAGGCGAGGGAATGGAATCTAGACATGAAAATGGCCTGGAGAGAGATCGTACAGCTTAGCACCACTGCTGCCTTGGAACGATGGGACCCTGCCCTGCCTCTGGAAGGAGCGGTCGCTAGATGTGAACAGGGGGCAATAGGGGTCCTGGAACAGGGACTGTCCACACACCCAAGTCCATGTTTGTGGTTATTCTCCACCCAACCCACCAAGGCGTTTACTGCTTGGTTAGAAGTGCTCACCCTTTTGATTACTAAGCTACGTGCTTCGGCAGTGCGAACCTTTGGCAAGGAGGTTGATATCCTCCTGTTGCCTGCATGCTTTCGGGAGGACCTTCCGCTCCCGGAGGGGATCCTGTTAGCCCTTAAGGGGTTTGCAGGAAAAATCAGGAGTAGTGACACGCCATCTATTTTTGACATTGCGCGTCCACTGCATGTTTCTCTGAAAGTGAGGGTTACCGACCACCCTGTACCGGGACCCACTGTCTTTACCGACGCCTCCTCAAGCACCCATAAGGGGGTGGTAGTCTGGAGGGAGGGCCCAAGGTGGGAGATAAAAGAAATAGCTGATTTGGGGGCAAGTGTACAACAACTGGAAGCACGCGCTGTGGCCATGGCACTTCTGCTGTGGCCGACAACGCCCACTAATGTAGTGACTGACTCCGCGTTTGTTGCGAAAATGTTACTCAAGATGGGACAGGAGGGAGTCCCGTCTACAGCGGCGGCTTTTATTTTAGAGGATGCGTTAAGCCAAAGGTCAGCCATGGCCGCCGTTCTCCACGTGCGGAGTCATTCTGAAGTGCCAGGGTTTTTCACAGAAGGAAATGACGTGGCAGATAGCCAAGCCACCTTTCAAGCGTATCCCTTGAGAGAGGCTAAAGATCTTCATACTGCTCTCCATATTGGACCCCGCGCGCTATCCAAAGCGTGTAATATATCTATGCAGCAGGCTAGGGAGGTTGTTCAGACCTGCCCGCATTGTAATCAGCCCCTGCGTTGGAGGCCGGGGTAAACCCTAGGGGTTTGGGACCCCTACAGATATGGCAGACAGACTTTACGCTTGAGCCTAGAATGGCCCCCCGTTCCTGGCTCGCTGTTACTGTGGATACCGCCTCATCGGCGATAGTCGTAACTCAGCATGGCCGTGTCACATCGGTTGCTGCACAACATCATTGGGCCACGGCTATCGCCGTTTTGGGAAGACCAAAGGCCATAAAAACAGATAACGGGTCCTGCTTCACGTCTAAATCCACGCGAGAGTGGCTCGCGAGATGGGGGATAGCACACACCACCGGGATTCCGGGTAATTCCCAGGGTCAAGCTATGGTAGAGCGGGCCAACCGGCTCCTGAAAGATAAGATCCGTGTGCTTGCGGAGGGGGACGGCTTTATGAAAAGAATCCCCACCAGCAAACAGGGGGAACTACTAGCCAAGGCAATGTATGCCCTCAATCACTTTGAGCGTGGTGAAAACACAAAAACACCGATACAAAAACACTGGAGACCTACCGTTCTTACAGAAGGACCCCCGGTTAAAATACGAATAGAGACAGGGGAGTGGGAAAAAGGATGGAACGTGCTGGTCTGGGGACGAGGTTATGCCGCTGTGAAAAACAGGGACACTGATAAGGTTATTTGGGTACCCTCTCGAAAAGTTAAACCGGACATCACCCAAAAGGATGAGGTGACTAAGAAAGATGAGGCGAGCCCTCTTTTTGCAGGCATTTCTGACTGGATACCCTGGGGAGACAAGCAAGAAGGACTCCAAGGAGAAACCGCTAGCAACAAGCAAGAAAGACCCGGAGAAGACACCCTTGCTGCCAACGAGAGTTAACTATATTCTCATTATTGGTGTCCTGGTCTTGTGTGAGGTTACGGGGGTAAGAGCTGATGTTCACTTACTCGAGCAGCCAGGGAACCTTTGGATTACATGGGCCAACCGTACAGGCCAAACGGATTTCTGCCTCTCTACACAGTCAGCCACCTCCCCTTTTCAAACATGTTTGATAGGTATCCCGTCCCCTATTTCCGAAGGTGATTTTAAGGGATACGTCTCTGATAATTGCACCACCTTGGGAACTGACCGGTTAGTCTCGTCAGCCAGCATTACCGGCGGCCCTGACAACAGCACCACCCTCACTTATCGAAAGGTTTCATGCTTGCTGTTAAAGCTGAATGTCTCTATGTGGGATGAGCCACCGGAACTACAGCTGCTAGGTTCCCAGTCTCTCCCTAACATTACTAATATTACTCAGATTTCTGGTGTAACTGGGGGATGCGTAGGCTTCACCCCACACTCCAATCCAAGTGGTGTTTACGGGTGGGGCCGGAGACAGGTTACACACAACCTCTTGATCGCCCCGTGGGTCAATCCTTTCTTTAACAGCGCTTCTAACTCCACGGAACCGTTTACGGTGGTGACAGCGGATAGACACAATCTTTTTATGGGGAGTGAGTACTGCGGTGCATATGGCTACAGATTTTGGGAAATATATAATTGCTCACACAGATTTGATAATTTTGATATTTACACCTGTGGAGATGTGCAGACAGTCAAATCCCCCGAAAAACAGTGTGTGGGGGGAGGAGGTATATGGGTTAATCAATCAAAGGAAATTAACGAGACAGAGCCGTTCAGTTTTACTGCGAACTGTACAGCTAGTAATTTGGGTAATGTCAGCGGATGTTGTGGAAAAACGATCACGATTCTCCCATCAGGGGCGTGGATCGACAGCACACAAGGTAGTTTCACTAAACCAAAAGCGCTACCACCCGCAATTTTCCTCATTTGTGGGGATCGCGCATGGCAAGGAATTCCCAGTCGTCCGGTAGGGGGCCCCTGCTATTTAGGCAAGCTTACCATGTTAGCACCCAACCATACAGATATTCTCAAGGTGCTTGCCAATTCATCGCGGACAGGTATAAGACGTAAACGAAGCACCTCACACCTGGATGATACATGCTCAGATGAAGTGCAGCTTTGGGGTCCTACAGCAAGAATCTTTGCATCTATCTTAGCCCCGGGGGTAGCAGCTGCGCAAGCCTTAAGAGAAATCGAGAGACTAGCCTGTTGGTCCGTTAAACAGGCTAACTTGACAACATCACTCCTCGGGGACTTATTGGATGATGTCACGAGTATTCGACACGCGGTCCTGCAGAACCGAGCGGCTATTGACTTCTTGCTCCTAGCTCACGGCCATGGCTGTGAGGACGTTGCCGGAATGTGTTGTTTCAATCTGAGTGATCACAGTGAGTCTATACAGAAGAAGTTCCAGCTAATGAAGGAACATGTCAATAAGATCGGCGTGGACAGCGACCCAATCGGAAGTTGGCTGCGAGGATTATTCGAGGGAATAGGGGAATGGGCCGTTCATTTGCTGAAAGGACTGCTTTTGGGGCTTGTAGTTATCTTTGTTGCTAGTAGTGTGCCTGCCTTGCCTTTTGCAATTTGTGTCCAGTAGCATCCGAAAGATGATTAATAATTCAATCAGCTATCACGCGGAATATAAGAAGTTGCAAAAGGCTTGTAGGCAGCCCGAAAATGGAGCAGTGTAAAGCAGTACGTGGGTGGTGGTATGAAACTTGCGAATCGAGCTGTAACGGGGCAAGGCTTGACTGAGGGGACCATAGTATGTATAGGCGAAAGGCGGGGCTTCGGTTGTACGCGGTTAGGAGTCCCCTCAGGATATAGTAGTTGCGCTTTTGCATAGGGAGGGGGAAATGTAGTCAAATAGAGCCAGAGGCAACTTGAATAGCCTAAAGACCAAATAAGGAAAAAGCAAGACATTCCATATGCTCATTGGTGGCAACTAGATAAGGAAGGAATGACGCAAGGACATATGGGCGTAGACGAAGCTATGCACGATTATATAAGCTGTTGCCACCATCAAATAAACGCCATTTTACCATTCACCACATTGGTGTGCACCTGGGTAGATGGACAGACCGTTGAGTCCCTAACGATTGCGAACACCTGAATGAAGCTGAAGGCTTCACACAAC
>ALVE_ros003_positive_7528_MT263511
TGTAGTCAAATAGAGCCAGAGGCAACTCGAATAGTCTAAAGACCAAATAAGGAAAAAGCAAGACATTCCATATGCTCATTGGTGGCAACTAGATAAGGAAGGAATGACGCAAGGACATATGGGCGTAGACGAAGCTATGCACGATTATATAAGCTGTTGCCACCATCAAATAAACGCCATTTTACCATTCACCACATTGGTGTGCACCTGGGTAGATGGACAGACCGTTGAGTCCCTAACGATTGCGAACACCTGAATGAAGCTGAAGGCTTCATTTGGTGACCCCGACGTGATTGTTAGGGAATAGTGGTCGGCCACAGGCGGCGTGGCGATCCTGCCCTCATCCGTCTCGCTTAACGGAGCGAGGACGATGACCCTAGTAGAGGGGGCTGCGGCTTAGGAGGGCAGAAGCTGAGTGACGTCGGAGGGAGCTCCACGGCCGGGGGCCAAGATAACCTACCGAGAACTCAGAGAGTCGTTGGAAGACGGGAAGGAAGCCCGACGACTGAGCAGTCCACCCCAGGCGCGATTCTGGTCGCCCGGTGGATCAAGCATGGAAGCCGTCATAAAGGTGATTTCGTCCGCGTGTAAAACCTATTGCGGGAAAACCTCTCCTTCTAAGAAGGAAATAGGGGCCATGTTGTCCCTGTTACAAAAGGAAGGGTTGCTTATGTCCCCCTCAGACTTATATTCCCCGGGGTCCTGGGATCCCATTACCGCGGCACTCACCCAGCGGGCAATGGTACTTGGGAAATCGGGAGAGTTAAAAACCTGGGGATTGGTTTTGGGGGCATTGAAGGCGGCTCGAGAGGAACAGGTTACATCTGAGCAAGCAAAGTTTTGGTTGGGATTAGGGGGAGGGAGGGTCTCTCCCCCAGGTCCGGAGTGCATCGAGAAACCAGCAACGGAGCGGCGAATCGACAAAGGGGAGGAAGTGGGAGAAACAACTGCGCAGCGAGATGCGAAGATGGCGCCGGAGAAAATGGCCACACCTAAAACCGTTGGCACATCCTGCTATCAGTGCGGAACAGCTACTGGCTGTAATTGCGCCACAGCCTCGGCCCCTTCCTCCTCCTTATGTGGGGAGTGGTTTGTATCCTTCCCTGTAAGGGGTGGGAGAGCAGCAGGGCCAGGGGGGTGACACACCTCGGGGGGCGGAACAGCCAAGGGCGGAGCCAGGGTACGCGGGTCAGGCCCCTGGGCCGGCCCTGACTGACTGTGCAATGATCAGGGAGGAGCTTGCGAGTACAGGTCCGCCCGTGGTGGCCATGCCTGTAGTGATTAATACATAGGGGCCCTCCTGGACCCCTCTGGAGCCAAAATTGATCACTGACTGGTTGATTCTGTCAGGACCTTTGGCTTACGATCCCCGATTACTATGGCAGAATTGTAAGCGCTTATGTCCTCCTTTCTGCTGCCTCATGATTTCACGAATCTAATGAGAGTTATTTTAGGACCTGCCCCATATGCCTTATGGATGGACGCTTGGGGAGTCCAACTACAGACGGTTATAGCGGCAGCCACTCGCGACCCCCGACACCCAGCGACGGTCAGGGCGGGGGGAACGGACTAACTTGGATCGTTTAAAGGGTTTGGCGGATGGAATGGCCGGCAATCCAGAGGGTCAGGCTGCGTTATTAAGACCGGGGGAACTGGTTGCTATTACGGCGTCGGCTCTCCAGGCGTTTAGAGAGGTCGCTCGGTTGGCGGAACCCACAGACCCGTGGGCGGAAATTACGCAGGGACCATCTGAGTCCTTTGTGGATTTTGCCAATCGTCTTATAAAGGCGGTTGAAGGGTCAGATCTCCCACCTTCCGCGCGGGCTCCGGTGATCATTGACTGCTTTAGGCAGAAGTCACAGCCAGATATCCAGCAGCTTATACGGGCAGCACCCTCCACGCTGACCACCCCAGGAGAGATAATCAAATATGTGCTAGACAGGCAGAAGACTGCCCCTCTTACGGATCGAGGCATAGCCGCGGCCATGTCGTCTGCTATTCAGCCCTTAGTTATGGCAGTAGTCAATAGAGAGAGGGATGGACAAACTGGGTCGGGTGGTCGTGCCCGAGGGCTCTGCTACACTTGTGGATCCCCGGGACATTATCAGGCGCAGTGCCCGAAAAAACGAAAGTCAGGAAACAGCCGTGAGCGATGTCAGCTGTGTGACGGGATGGGACACAACGCTAAACAGTGCAGAAGGCGGGATGGCAACCAGGGCCAACGCCCAGGAAGAGGCCTCTCTTCGGGGCCGTGGCCCGTCTCTCAGCAGCCTGCCGTCTCGTTAGCGATGACAATGGAACATAAAGATCGCCCCTTGGTTAGGGTCATTCTGACTAACACTGGGAGTCATCCGGTCAAACAGCGTTCGGTGTATATCACCGCGCTGTTGGACTCTGGAGCGGACATCACTATTATTTCAGAGGAGGATTGGCCCACCGATTGGCCAGTGATGGAGGCCGCGAACCCGCAGATCCATGGGATAGGAGGGGGAATTCCCATGCGAAAATCCCGGGATATGATAGAGGTGGGGGTTATTAACCGAGACGGGTCTTTGGAGCGACCCCTGCTCCTCTTCCCCGCAGTAGCTATGGTTAGAGGGAGTATCCTAGGAAGAGATTGTCTGCAGGGCCTAGGGCTCCGCTTGACAAATTTATAGGGAGGGCCACTGTTCTTACTGTTGCGCTACATCTGGCTATTCCGCTCAAATGGAAGCCAGACCACACGCCTGTGTGGATTGACCAGTGGCCCCTTCCTGAAGGTAAACTTGTAGCGCTAACGCAATTAGTGGAAAAAGAATTACAGTTAGGACATATAGAACCTTCACTTAGTTGTTGGAACACACCTGTCTTTGTGATCCGGAAGGCTTCCGGGTCTTATCGCTTATTGCATGACTTGCGCGCTGTTAACGCCAAGCTTGTTCCTTTTGGGGCCGTCCAACAGGGGGCGCCAGTTCTCTCCGCGCTCCCGCGTGGCTGGCCCCTGATGGTCCTAGACCTCAAGGATTGCTTCTTTTCTATTCCTCTTGCGGAACAAGATCGCGAAGCTTTTGCATTTACGCTCCCCTCTGTGAATAACCAGGCCCCCGCTCGAAGATTCCAATGGAAGGTCTTGCCCCAAGGGATGACCTGTTCTCCCACTATCTGTCAGTTGGTAGTGGGTCAGGTACTTGAGCCCTTGCGACTCAAGCACCCATCTCTGTGCATGTTGCATTATATGGATGATCTTTTGCTAGCCGCCTCAAGTCATGATGGGTTGGAAGCGGCAGGGGAGGAGGTTATCAGTACATTGGAAAGAGCCGGGTTCACCATTTCGCCTGATAAGATCCAGAGGGAGCCCGGAGTACAATATCTTGGGTACAAGTTAGGCAGTACGTATGTAGCACCCGTAGGCCTGGTAGCAGAACCCAGGATAGCCACCTTGTGGGATGTTCAAAAGCTGGTGGGGTCACTTCAGTGGCTTCGCCCAGCGTTAGGAATCCCGCCACGACTGATGGGCCCCTTTTATGAGCAGTTACGAGGGTCAGATCCTAACGAGGCGAGGGAATGGAATCTAGACATGAAAATGGCCTGGAGAGAGATCGTACAGCTTAGCACCACTGCTGCCTTGGAACGATGGGACCCTGCCCTGCCTCTGGAAGGAGCGGTCGCTAGATGTGAACAGGGGGCAATAGGGGTCCTGGGACAGGGACTGTCCACACACCCAAGGCCATGTTTGTGGTTATTCTCCACCCAACCCACCAAGGCGTTTACTGCTTGGTTAGAAGTGCTCACCCTTTTGATTACTAAGCTACGTGCTTCGGCAGTGCGAACCTTTGGCAAGGAGGTTGATATCCTCCTGTTGCCTGCATGCTTTCGGGAGGACCTTCCGCTCCCGGAGGGGATCCTGTTAGCCCTTAAGGGGTTTGCAGGAAAAATCAGGAGTAGTGACACGCCATCTATTTTTGACATTGCGCGTCCACTGCATGTTTCTCTGAAAGTGAGGGTTACCGACCACCCTGTACCGGGACCCACTGTCTTTACCGACGCCTCCTCAAGCACCCATAAGGGGGTGGTAGTCTGGAGGGAGGGCCCAAGGTGGGAGATAAAAGAAATAGCTGATTTGGGGGCAAGTGTACAACAACTGGAAGCACGCGCTGTGGCCATGGCACTTCTGCTGTGGCCGACAACGCCCACTAATGTAGTGACTGACTCCGCGTTTGTTGCGAAAATGTTACTCAAGATGGGACAGGAGGGAGTCCCGTCTACAGCGGCGGCTTTTATTTTAGAGGATGCGTTAAGCCAAAGGTCAGCCATGGCCGCCGTTCTCCACGTGCGGAGTCATTCTGAAGTGCCAGGGTTTTTCACAGAAGGAAATGACGTGGCAGATAGCCAAGCCACCTTTCAAGCGTATCCCTTGAGAGAGGCTAAAGATCTTCATACTGCTCTCCATATTGGACCCCGCGCGCTATCCAAAGCGTGTAATATATCTATGCAGCAGGCTAGGGAGGTTGTTCAGACCTGCCCGCATTGTAATTCAGCCCCTGCGTTGGAGGCCGGGGTAAACCCTAGGGGTTTGGGACCCCTACAGATATGGCAGACAGACTTTACGCTTGAGCCTAGAATGGCCCCCCGTTCCTGGCTCGCTGTTACTGTGGATACCGCCTCATCGGCGATAGTCGTAACTCAGCATGGCCGTGTCACATCGGTTGCTGCACAACATCATTGGGCCACGGCTATCGCCGTTTTGGGAAGACCAAAGGCCATAAAAACAGATAACGGGTCCTGCTTCACGTCTAAATCCACGCGAGAGTGGCTCGCGAGATGGGGGATAGCACACACCACCGGGATTCCGGGTAATTCCCAGGGTCAAGCTATGGTAGAGCGGGCCAACCGGCTCCTGAAAGATAAGATCCGTGTGCTTGCGGAGGGGGACGGCTTTATGAAAAGAATCCCCACCAGCAAACAGGGGGAACTACTAGCCAAGGCAATGTATGCCCTCAATCACTTTGAGCGTGGTGAAAACACAAAAACACCGATACAAAAACACTGGAGACCTACCGTTCTTACAGAAGGACCCCCGGTTAAAATACGAATAGAGACAGGGGAGTGGGAAAAAGGATGGAACGTGCTGGTCTGGGGACGAGGTTATGCCGCTGTGAAAAACAGGGACACTGATAAGGTTATTTGGGTACCCTCTCGAAAAGTTAAACCGGACATCACCCAAAAGGATGAGGTGACTAAGAAAGATGAGGCGAGCCCTCTTTTTGCAGGCATTTCTGACTGGATACCCTGGGGAGACAAGCAAGAAGGACTCCAAGGAGAAACCGCTAGCAACAAGCAAGAAAGACCCGGAGAAGACACCCTTGCTGCCAACGAGAGTTAACTATATTCTCATTATTGGTGTCCTGGTCTTGTGTGAGGTTACGGGGGTAAGAGCTGATGTTCACTTACTCGAGCAGCCAGGGAACCTTTGGATTACATGGGCCAACCGTACAGGCCAAACGGATTTCTGCCTCTCTACACAGTCAGCCACCTCCCCTTTTCAAACATGTTTGATAGGTATCCCGTCCCCTATTTCCGAAGGTGATTTTAAGGGATACGTCTCTAATAATTGCACCACCTTGGGAACTGACCGGTTAATCTCGTCAGCCAGCATTACCGGCGGCCCTGACAACAGCACCACCCTCACTTATCGAAAGGTTTCATGCTTGCTGTTAAAGCTGAATGTCTCTATGTGGGATGAGCCACCGGAACTACAGCTGCTAGGTTCCCAGTCTCTCCCTAACATTACTAATATTACTCAGATTTCTGGTGTAACTGGGGGATGCGTAGGCTTCACCCCACACTCCAATCCAAGTGGTGTTTACGGGTGGGGCCGGAGACAGGTTACACACAACCTTTTGATCGCCCCGTGGGTCAATCCTTTCTTTAACAGCGCTTCTAACTCCACGGAACCGTTTACGGTGGTGACAGCGGATAGACACAATCTTTTTATGGGGAGTGAGTACTGCGGTGCATATGGCTACAGATTTTGGGAAATATATAATTGCTCACACAGATTTGATAATTTTGATATTTACACCTGTGGAGATGTGCAGACAGTCAAATCCCCCGAAAAACAGTGTGTGGGGGGAGGAGGTATATGGGTTAATCAATCAAAGGAAATTAATGAGACAGAGCCGTTCAGTTTTACTGCGAACTGTACAGCTAGTAATTTGGGTAATGTCAGCGGATGTTGTGGAAAAACGATCACGATTCTCCCATCAGGGGCGTGGATCGACAGCACACAAGGTAGTTTCACTAAACCAAAAGCGCTACCACCCGCAATTTTCCTCATTTGTGGGGATCGCGCATGGCAAGGAATTCCCAGTCGTCCGGTAGGGGGCCCCTGCTATTTAGGCAAGCTTACCATGTTAGCACCCAACCATACAGATATTCTCAAGGTGCTTGCCAATTCATCGCGGACAGGTATAAGACGTAAACGAAGCACCTCACACCTGGATGATACATGCTCAGATGAAGTGCAGCTTTGGGGTCCTACAGCAAGAATCTTTGCATCTATCTTAGCCCCGGGGGTAGCAGCTGCGCAAGCCTTAAGAGAAATCGAGAGACTAGCCTGTTGGTCCGTTAAACAGGCTAACTTGACAACATCACTCCTCGGGGACTTATTGGATGATGTCACGAGTATTCGACACGCGGTCCTGCAGAACCGAGCGGCTATTGACTTCTTGCTTCTAGCTCACGGCCATGGCTGTGAGGACGTTGCCGGAATGTGTTGTTTCAATCTGAGTGATCACAGTGAGTCTATACAGAAGAAGTTCCAGCTAATGAAGGAACATGTCAATAAGATCGGCGTGGACAGCGACCCAATCGGAAGTTGGCTGCGAGGATTATTCGAGGGAATAGGGGAATGGGCCGTTCATTTGCTGAAAGGACTGCTTTTGGGGCTTGTAGTTATCTTGTTGCTAGTAGTGTGCCTGCCTTGCCTTTTGCAAATTGTGTCCAGTAGCATCCGAAAGATGATTAATAATTCAATCAGCTATCACACGGAATATAAGAAGTTGCAAAAGGCTTGTAGGCAGCCCGAAAATGGAGCAGTGTAAAGCAGTACATGGGTGGTGGTATGAAACTTGCGAATCGGGCTGTAACGGGGCAAGGCTTGACTGAGGGGACCATAGTATGTATAGGCGAAAGGCGGGGCTTCGGTTGTACGCGGTTAGGAGTCCCCTCAGGATATAGTAGTTGCGCTTTTGCATAGGGAGGGGGAAATGTAGTCAAATAGAGCCAGAGGCAACTCGAATAGTCTAAAGACCAAATAAGGAAAAAGCAAGACATTCCATATGCTCATTGGTGGCAACTAGATAAGGAAGGAATGACGCAAGGACATATGGGCGTAGACGAAGCTATGCACGATTATATAAGCTGTTGCCACCATCAAATAAACGCCATTTTACCATTCACCACATTGGTGTGCACCTGGGTAGATGGACAGACCGTTGAGTCCCTAACGATTGCGAACACCTGAATGAAGCTGAAGGCTTCACCTATC
>ALVE_ros004_positive_7530_MT263512
TGTAGTCAAATAGAGCCAGAGGCAACTTGAATAGTCTAAAGACCAAATAAGGAAAAAGCAAGACATTCCATATGCTCATTGGTGGCAACTAGATAAGGAAGGAATGACGCAAGGACATATGGGCGTAGACGAAGCTATGCACGATTATATAAGCTGTTGCCACCATCAAATAAACGCCATTTTACCATTCACCACATTGGTGTGCACCTGGGTAGATGGACAGACCGTTGAGTCCCTAACGATTGCGAACACCTGAATGAAGCTGAAGGCTTCATTTGGTGACCCCGACGTGATCGTTAGGGAATAGTGGTCGGCCACAGGCGGCGTGGCGATCCTGCCCTCATCCGTCTCGCTTAACGGAGCGAGGACGATGACCCTAGTAGAGGGGGCTGCGGCTTAGGAGGGCAGAAGCTGAGTGACGTCGGAGGGAGCTCCACGGCCGGGGGCCAAGATAACCTACCGAGAACTCAGAGAGTCGTTGGAAGACGGGAAGGAAGCCCGACGACTGAGCAGTCCACCCCAGGCGTGATTCTGGTCGCCCGGTGGATCAAGCATGGAAGCCGTCATAAAGGTGATTTCGTCCGCGTGTAAAACCTATTGCGGGAAAACCTCTCCTTCTAAGAAGGAAATAGGGGCCATGTTGTCCCTGTTACAAAAGGAAGGGTTGCTTATGTCCCCCTCAGACTTATATTCCCCGGGGTCCTGGGATCCCATTACCGCGGCACTCACCCAGCGGGCAATGGTACTTGGGAAATCGGGAGAGTTAAAAACCTGGGGATTGGTTTTGGGGGCATTGAAGGCGGCTCGAGAGGAACAGGTTACATCTGAGCAAGCAAAGTTTTGGTTGGGATTAGGGGGAGGGAGGGTCTCTCCCCCAGGTCCGGAGTGCATCGAGAAACCAGCAACGGAGCGGCGAATCGACAAAGGGGAGGAAGTGGGAGAAACAACTGCGCAGCGAGATGCGAAGATGGCGCCGGAGAAAATGGCCACACCTAAAACCGTTGGCACATCCTGCTATCAGTGCGGAACAGCTACTGGCTGTAATTGCGCCACAGCCTCGGCCCCTCCTCCTCCTTATGTGGGGAGTGGTTTGTATCCTTCCCTGGCGGGGGTGGGAGAGCAGCAGGGCCAGGGGGGTGACACACCTTGGGGGGCGGAACAGCCAAGGGCGGAGCCAGGGCACGCGGGTCTGGCCCCTGGGCCGGCCCTGACTGACTGGGCAAGGATCAGGGAGGAGCTTGCGAGTACAGGTCCGCCCGTGGTGGCCATGCCTGTAGTGATTAAGACAGAGGGACCCGCCTGGACCCCTCTGGAGCCAAAATTGATCACAAGACTGGCTGATACGGTCAGGACCAAGGGCTTACGATCCCCGATCACTATGGCAGAAGTGGAAGCGCTCATGTCCTCCCCGCTGCTGCCGCATGACGTCACGAATCTAATGAGAGTTATTTTAGGACCTGCCCCATATGCCTTATGGATGGACGCTTGGGGAGTCCAACTACAGACGGTTATAGCGGCAGCCACTCGCGACCCCCGACACCCAGCGACGGTCAAGGGCGGGGGGAACGGACTAACTTGGATCGTTTAAAGGGTTTGGCGGATGGAATGGCCGGCAATCCAGAGGGTCAGGCTGCGTTATTAAGACCGGGGGAACTGGTTGCTATTACGGCGTCGGCTCTCCAGGCGTTTAGAGAGGTCGCTCGGTTGGCGGAACCCACAGACCCGTGGGCGGAAATTACGCAGGGACCATCTGAGTCCTTTGTGGATTTTGCCAATCGTCTTATAAAGGCGGTTGAAGGGTCAGATCTCCCACCTTCCGCGCGGGCTCCGGTGATCATTGACTGCTTTAGGCAGAAGTCACAGCCAGATATCCAGCAGCTTATACGGGCAGCACCCTCCACGCTGACCACCCCAGGAGAGATAATCAAATATGTGCTAGACAGGCAGAAGACTGCCCCTCTTACGGATCGAGGCATAGCCGCGGCCATGTCGTCTGCTATTCAGCCCTTAGTTATGGCAGTAGTCAATAGAGAGAGGGATGGACAAACTGGGTCGGGTGGTCGTGCCCGAGGGCTCTGCTACACTTGTGGATCCCCGGGACATTATCAGGCGCAGTGCCCGAAAAAACGAAAGTCAGGAAACAGCCGTGAGCGATGTCAGCTGTGTGACGGGATGGGACACAACGCTAAACAGTGCAGAAGGCGGGATGGCAACCAGGGCCAACGCCCAGGAAGAGGCCTCTCTTCGGGGCCGTGGCCCGTCTCTCAGCAGCCTGCCGTCTCGTTAGCGATGACAATGGAACATAAAGATCGCCCCTTGGTTAGGGTCATTCTGACTAACACTGGGAGTCATCCGGTCAAACAGCGTTCGGTGTATATCACCGCGCTGTTGGACTCTGGAGCGGACATCACTATTATTTCAGAGGAGGACTGGCCCACCGATTGGCCAGTGATGGAGGCCGCGAACCCGCAGATCCATGGGATAGGAGGGGGAATTCCCATGCGAAAATCCCGGGATATGATAGAGGTGGGGGTTATTAACCGAGACGGGTCTTTGGAGCGACCCCTGCTCCTCTTCCCCGCAGTAGCTATGGTTAGAGGGAGTATCCTAGGAAGAGATTGTCTGCAGGGCCTAGGGCTCCGCTTGACAAATTTATAGGGAGGGCCACTGTTCTTACTGTTGCGCTACATCTGGCTATTCCGCTCAAATGGAAGCCAGACCACACGCCTGTGTGGATTGACCAGTGGCCCCTTCCTGAAGGTAAACTTGTAGCGCTAACGCAATTAGTGGAAAAAGAATTACAGTTAGGACATATAGAACCTTCACTTAGTTGTTGGAACACACCTGTCTTTGTGATCCGGAAGGCTTCCGGGTCTTATCGCTTATTGCATGACTTGCGCGCTGTTAACGCCAAGCTTGTTCCTTTTGGGGCCGTCCAACAGGGGGCGCCAGTTCTCTCCGCGCTCCCGCGTGGCTGGCCCCTGATGGTCCTAGACCTCAAGGATTGCTTCTTTTCTATTCCTCTTGCGGAACAAGATCGCGAAGCTTTTGCATTTACGCTCCCCTCTGTGAATAACCAGGCCCCCGCTCGAAGATTCCAATGGAAGGTCTTGCCCCAAGGGATGACCTGTTCTCCCACTATCTGTCAGTTGGTAGTGGGTCAGGTACTTGAGCCCTTGCGACTCAAGCACCCATCTCTGTGCATGTTGCATTATATGGATGATCTTTTGCTAGCCGCCTCAAGTCATGATGGGTTGGAAGCGGCAGGGGAGGAGGTTATCAGTACATTGGAAAGAGCCGGGTTCACCATTTCGCCTGATAAGATCCAGAGGGAGCCCGGAGTACAATATCTTGGGTACAAGTTAGGCAGTACGTATGTAGCACCCGTAGGCCTGGTAGCAGAACCCAGGATAGCCACCTTGTGGGATGTTCAAAAGCTGGTGGGGTCACTTCAGTGGCTTCGCCCAGCGTTAGGAATCCCGCCACGACTGATGGGCCCCTTTTATGAGCAGTTACGAGGGTCAGATCCTAACGAGGCGAGGGAATGGAATCTAGACATGAAAATGGCCTGGAGAGAGATCGTACAGCTTAGCACCACTGCTGCCTTGGAACGATGGGACCCTGCCCTGCCTCTGGAAGGAGCGGTCGCTAGATGTGAACAGGGGGCAATAGGGGTCCTGGGACAGGGACTGTCCACACACCCAAGGCCATGTTTGTGGTTATTCTCCACCCAACCCACCAAGGCGTTTACTGCTTGGTTAGAAGTGCTCACCCTTTTGATTACTAAGCTACGTGCTTCGGCAGTGCGAACCTTTGGCAAGGAGGTTGATATCCTCCTGTTGCCTGCATGCTTTCGGGAGGACCTTCCGCTCCCGGAGGGGATCCTGTTAGCCCTTAAGGGGTTTGCAGGAAAAATCAGGAGTAGTGACACGCCATCTATTTTTGACATTGCGCGTCCACTGCATGTTTCTCTGAAAGTGAGGGTTACCGACCACCCTGTACCGGGACCCACTGTCTTTACCGACGCCTCCTCAAGCACCCATAAGGGGGTGGTAGTCTGGAGGGAGGGCCCAAGGTGGGAGATAAAAGAAATAGCTGATTTGGGGGCAAGTGTACAACAACTGGAAGCACGCGCTGTGGCCATGGCACTTCTGCTGTGGCCGACAACGCCCACTAATGTAGTGACTGACTCCGCGTTTGTTGCGAAAATGTTACTCAAGATGGGACAGGAGGGAGTCCCGTCTACAGCGGCGGCTTTTNATTTTAGAGGATGCGTTAAGCCAAAGGTCAGCCATGGCCGCCGTTCTCCACGTGCGGAGTCATTCTGAAGTGCCAGGGTTTTTCACAGAAGGAAATGACGTGGCAGATAGCCAAGCCACCTTTCAAGCGTATCCCTTGAGAGAGGCTAAAGATCTTCATACTGCTCTCCATATTGGACCCCGCGCGCTATCCAAAGCGTGTAATATATCTATGCAGCAGGCTAGGGAGGTTGTTCAGACCTGCCCGCATTGTAATTCAGCCCCTGCGTTGGAGGCCGGGGTAAACCCTAGGGGTTTGGGACCCCTACAGATATGGCAGACAGACTTTACGCTTGAGCCTAGAATGGCCCCTCGTTCCTGGCTCGCTGTTACTGTGGATACCGCCTCATCGGCGATAGTCGTAACTCAGCATGGCCGTGTCACATCGGTTGCTGCACAACATCATTGGGCCACGGCTATCGCCGTTTTGGGAAGACCAAAGGCCATAAAAACAGATAACGGGTCCTGCTTCACGTCTAAATCCACGCGAGAGTGGCTCGCGAGATGGGGGATAGCACACACCACCGGGATTCCGGGTAATTCCCAGGGTCAAGCTATGGTAGAGCGGGCCAACCGGCTCCTGAAAGATAAGATCCGTGTGCTTGCGGAGGGGGACGGCTTTATGAAAAGAATCCCCACCAGCAAACAGGGGGAACTACTAGCCAAGGCAATGTATGCCCTCAATCACTTTGAGCGTGGTGAAAACACAAAAACACCGATACAAAAACACTGGAGACCTACCGTTCTTACAGAAGGACCCCCGGTTAAAATACGAATAGAGACAGGGGAGTGGGAAAAAGGATGGAACGTGCTGGTCTGGGGACGAGGTTATGCCGCTGTGAAAAACAGGGACACTGATAAGGTTATTTGGGTACCCTCTCGAAAAGTTAAACCGGACATCACCCAAAAGGATGAGGTGACTAAGAAAGATGAGGCGAGCCCTCTTTTTGCAGGCATTTCTGACTGGATACCCTGGGGAGACAAGCAAGAAGGACTCCAAGGAGAAACCGCTAGCAACAAGCAAGAAAGACCCGGAGAAGACACCCTTGCTGCCAACGAGAGTTAACTATATTCTCATTATTGGTGTCCTGGTCTTGTGTGAGGTTACGGGGGTAAGAGCTGATGTTCACTTACTCGAGCAGCCAGGGAACCTTTGGATTACATGGGCCAACCGTACAGGCCAAACGGATTTCTGCCTCTCTACACAGTCAGCCACCTCCCCTTTTCAAACATGTTTGATAGGTATCCCGTCCCCTATTTCCGAAGGTGGTTTTAAGGGATACGTCTCTGATAATTGCACCACCTAGGGAACTGACCGGTTAGTCTCGTCAGCCAGCATTACCGGCGGCCCTGACAACAGCACCACCCTCACTTATCGAAAGGTTTCATGCTTGCTGTTAAAGCTGAATGTCTCTATGTGGGATGAGCCACCGGAACTACAGCTGCTAGGTTCCCAGTCTCTCCCTAACATTACTAATATTACTCAGATTTCTGGTGTAACTGGGGGATGCGTAGGCTTCACCCCACACTCCAATCCAAGTGGTGTTTACGGGTGGGGCCGGAGACAGGTTACACACAACCTCTTGATCGCCCCGTGGGTCAATCCTTTCTTTAACAGCGCTTCTAACTCCACGGAACCGTTTACGGTGGTGACAGCGGATAGGCACAATCTTTTTATGGGGAGTGAGTACTGCGGTGCATATGGCTACAGATTTTGGGAAATATATAATTGCTCACACAGATTTGATAATTTTGATATTTACACCTGTGGAGATGTGCAGACAGTCAAATCCCCCGAAAAACAGTGTGTGGGGGGAGGAGGTATATGGGTTAATCAATCAAAGGAAATTAACGAGACAGAGCCGTTCAGTTTTACTGCGAACTGTACAGCTAGTAATTTGGGTAATGTCAGCGGATGTTGTGGAAAAACGATCACGATTCTCCCATCAGGGGCGTGGATCGACAGCACACAAGGTAGTTTCACTAAACCAAAAGCGCTACCACCCGCAATTTTCCTCATTTGTGGGGATCGCGCATGGCAAGGAATTCCCAGTCGTCCGGTAGGGGGCCCCTGCTATTTAGGCAAGCTTACCATGTTAGCACCCAACCATACAGATATTCTCAAGGTGCTTGCCAATTCATCGCGGACAGGTATAAGACGTAAACGAAGCACCTCACACCTGGATGATACATGCTCAGATGAAGTGCAGCTTTGGGGTCCTACAGCAAGAATCTTTGCATCTATCTTAGCCCCGGGGGTAGCAGCTGCGCAAGCCTTAAGAGAAATCGAGAGACTAGCCTGTTGGTCCGTTAAACAGGCTAACTTGACAACATCACTCCTCGGGGACTTATTGGATGATGTCACGAGTATTCGACACGCGGTCCTGCAGAACCGAGCGGCTATTGACTTCTTGCTTCTAGCTCACGGCCATGGCTGTGAGGACGTTGCCGGAATGTGTTGTTTCAATCTGAGTGATCACAGTGAGTCTATACAGAAGAAGTTCCAGCTAATGAAGGAACATGTCAATAAGATCGGCGTGGACAGCGACCCAATCGGAAGTTGGCTGCGAGGATTATTCGAGGGAATAGGGGAATGGGCCGTTCATTTGCTGAAAGGACTGCTTTTGGGGCTTGTAGTTATCTTGTTGCTAGTAGTGTGCCTGCCTTGCCTTTTGCAATTTGTGTCCAGTAGCATCCGAAAGATGATTAATAATTCAATCAGCTATCACGCGGAATATAAGAAGTTGCAAAAGGCTTGTAGGCAGCCCGAAAATGGAGCAGTGTAAAGCAGTACGTGGGTGGTGGTATGAAACTTGCGAATCGGGCTGTAACGGGGCAAGGCTTGACTGAGGGGACCATAGTATGTATAGGCGAAAGGCGGGGCTTCGGTTGTACGCGGTTAGGAGTCCCCTCAGGATATAGTAGTTGCGCTTTTGCATAGGGAGGGGGAAATGTAGTCAAATAGAGCCAGAGGCAACTTGAATAGTCTAAAGACCAAATAAGGAAAAAGCAAGACATTCCATATGCTCATTGGTGGCAACTAGATAAGGAAGGAATGACGCAAGGACATATGGGCGTAGACGAAGCTATGCACGATTATATAAGCTGTTGCCACCATCAAATAAACGCCATTTTACCATTCACCACATTGGTGTGCACCTGGGTAGATGGACAGACCGTTGAGTCCCTAACGATTGCGAACACCTGAATGAAGCTGAAGGCTTCACTTGAC
>ALVE_ros005_negative_soloLTR_280_MT263513
TATCAATGTAGTCAAATAGAGCCAGAGGCAACTCGAATAGTCTAAAGACCAAATAAGGAAAAAGCAAGACATTCCATATGCTCATTGGTGGCAACTAGATAAGGAAGGAATGACGCAAGGACATATGGGCGTAGACGAAGCTATGCACGATTATATAAGCTGTTGCCACCATCAAATAAACGCCATTTTACCATTCACCACATTGGTGTGCACCTGGGTAGATGGACAGACCGTTGAGTCCCTAACGATTGCGAACACCTGAATGAAGCTGAAGGCTTCA
>ALVE_ros007_negative_1400_MT263514
TATGGGTTAATCAATCAAAGGAAATCAATGGGACAGAGCCGTTCAGTTTTACTGCGAACTGTACATCTAGTAATTTGGGTAATGTCAGCGGATGTTGTGGAAAAACGACCACGATTCTCCCATCAGGGGCGTGGATCGACAGCACACAAGGTAGTTTCACCAAACCAAAAGCGCTACCACCCGCAATTTTCCTCATTTGTGGGGATCGCGCATGGCAAGGAATTCCCAGTCGTCCGGTAGGGGGCCCCTGCTATTTAGGCAAGCTTACCATGTTAGCACCTAACCATACAGATATTCTCAAGGTGCTTACCAATTCATCGCGGACAGGTATAAGACGTAAACGAAGCACCTCACACCTGGACGATACATGCTCAGATGAGTGCAGCTTTGGGGCCCTACAGCAAGAATCTTTGCATCTATCTTAGCCCCGGGGGTAGCAGCTGCGCAAGCCTTAAGAGAAATTGAGAGGCTAGCCTGTTGGTCCGTTAAACAGGCTAACTTGACAACATCACTCCTCGGGGACTTATTGGATGATGTCACGAGTATTCGACACGCGGTCCTGCAGAACCGAGCGGCTATTGACTTCTTGCTTCTAGCTCACGGCCATGGCTGTGAGGACGTTGCCGGAATGTGTTGTTTCAATCTGAGTGATCACAGTGAGTCTATACAGAAGAAGTTCCAGCTAATGAAGGAACATGTCAATAAGATCGGCGTGGACAGCGACCCAATCGGAAGTTGGCTGCGAGGATTATTCGGGGGAATAGGGGAATGGGCCGTTCATTTGCTGAAAGGACTGCTTTTGGGGCTTGTAGTTATTTTGTCGCTAGTAGTGTGCTTGCCTTGCCTTTTGCAAATTGTGTCCAGTAGCATCCGAAAGATGATTAATAATTCAATCAGCTATCACACGGAATATAAGAAGTTGCAAAAGGCTTGTAGGCAGCCCGAAAATGGAGCAATGTAAAGCAGTACATGGGTGGTGGTATGAAACTTGCGAATCGGGCTGTAACGGGGCAAGGCTTGACTGAGGGGACCATAGTATGTATAGGCGAAGGGCGGGGCTTCGGTTGTACGCGGTTAGGAGTCCCCTCAGGATATAGTAGTTGCGCTTTTGCATAGGGAGGGGGAAATGTAGTCAAATAGAGCCAGAGGCAACTTGAATAGTCTAAAGACCAAATAAGGAAAAAGCAAGACATTCCATATGCTCATTGGTGGCGACTAGATAAGGAAGGAATGACGCAAGGACATATGGGCGTAGACGAAGCTATGTACGATTATATAAGCTGTTGCCACCATCAAATAAATGCCATTTTACCATCCACCACATTGGTGTGCACCTGGGTAGATGGACAGACCGTTGAGTCCCTAACGATTGCGAACACCTGAATGAATTCTGGAGAGAA
>ALVE_ros008_positive_7529_MT263515
TGTAGTCAAATAGAGCCAGAGGCAACTTGAATAGTCTAAAGACCAAATAAGGAAAAAGCAAGACATTCCATATGCTCATTGGTGGCAACTAGATAAGGAAGGAATGACGCAAGGACATATGGGCGTAGACGAAGCTATGCACGATTATATAAGCTGTTGCCACCATCAAATAAACGCCATTTTACCATTCACCACATTGGTGTGCACCTGGGTAGATGGACAGACCGTTGAGTCCCTAACGATTGCGAACACCTGAATGAAGCTGAAGGCTTCATTTGGTGACCCCGACGTGATCGTTAGGGAATAGTGGTCGGCCACAGGCGGCGTGGCGATCCTGCCCTCATCCGTCTCGCTTAACGGAGCGAGGACGATGACCCTAGTAGAGGGGGCTGCGGCTTACGAGGGCAGAAGCTGAGTGACGTCGGAGGGAGCTCCACGGCCGGGGGCCAAGATAACCTACCGAGAACTCAGAGAGTCGTTGGAAGACGGGAAGGAAGCCCGACGACTGAGCAGTCCACCCCAGGCGCGATTCTGGTCGCCCGGTGGATCAAGCATGGAAGCCGTCATAAAGGTGATTTCGTCCGCGTGTAAAACCTATTGCGGGGAAATCTCTCCTTCTAAGAAGGAAATAGGGGCCATGTTGTCCCTGTTACAAAAGGAAGGGTTGCTTATGTCTCCCTCAGATTTATATTCCCCGGGGTCCTGGGATCCCATCACTGCGGCGCTCTCCCAGCGGGCAATGGTACTTGGGAAATCGGGAGAGTTAAAAACCTGGGGATTGGTTTTGGGGGCATTGAAGGCGGCTCGAGAGGAACAGGTTACATCTGAGCAAGCAAAGTTTTGGTTGGGATTAGGGGGAGGGAGGGTCTCTCCCCCAGGTCCGGAGTGCATCGAGAAACCAGCAACGGAGCGGCGAATCGACAAAGGGGAGGAAGTGGGAGAAACAACTGCGCAGCGAGATGCGAAGATGGCGCCGGAGAAAATGGCCACACCTAAAACCGTTGGCACATCCTGCTATCAGTGCGGAACAGCTACTGGCTGTAATTGCGCCACAGCCTCGGCCCCTCCTCCTCCTTATGTGGGGAGTGGTTTGTATCCTTCCCTGGCGGGGGTGGGAGAGCAGCAGGGCCAGGGGGGTGACACACCTTGGGGGGCGGAACAGCCAAGGGCGGAGCCAGGGCACGCGGGTCTGGCCCCTGGGCCGGCCCTGACTGACTGGGCAAGGATCAGGGAGGAGCTTGCGAGTACAGGTCCGCCCGTGGTGGCCATGCCTGTAGTGATTAAGACAGAGGGACCCGCCTGGACCCCTCTGGAGCCAAAATTGATCACAAGACTGGCTGATACGGTCAGGACCAAGGGCTTACGATCCCCGATCACTATGGCAGAAGTGGAAGCGCTCATGTCCTCCCCGCTGCTGCCGCATGACGTCACGAATCTAATGAGAGTTATTTTAGGACCTGCCCCATATGCCTTATGGATGGACGCTTGGGGAGTCCAACTACAGACGGTTATAGCGGCAGCCACTCGCGACCCCCGACACCCAGCGACGGTCAAGGGCGGGGGGAACGGACTAACTTGGATCGTTTAAAGGGTTTGGCGGATGGAATGGCCGGCAATCCAGAGGGTCAGGCTGCGTTATTAAGACCGGGGGAACTGGTTGCTATTACGGCGTCGGCTCTCCAGGCGTTTAGAGAGGTCGCTCGGTTGGCGGAACCCACAGACCCGTGGGCGGAAATTACGCAGGGACCATCTGAGTCCTTTGTGGATTTTGCCAATCGTCTTATAAAGGCGGTTGAAGGGTCAGATCTCCCACCTTCCGCGCGGGCTCCGGTGATCATTGACTGCTTTAGGCAGAAGTCACAGCCAGATATCCAGCAGCTTATACGGGCAGCACCCTCCACGCTGACCACCCCAGGAGAGATAATCAAATATGTGCTAGACAGGCAGAAGACTGCCCCTCTTACGGATCGAGGCATAGCCGCGGCCATGTCGTCTGCTATTCAGCCCTTAGTTATGGCAGTAGTCAATAGAGAGAGGGATGGACAAACTGGGTCGGGTGGTCGTGCCCGAGGGCTCTGCTACACTTGTGGATCCCCGGGACATTATCAGGCGCAGTGCCCGAAAAAACGAAAGTCAGGAAACAGCCGTGAGCGATGTCAGCTGTGTGACGGGATGGGACACAACGCTAAACAGTGCAGAAGGCGGGATGGCAACCAGGGCCAACGCCCAGGAAGAGGCCTCTCTTCGGGGCCGTGGCCCGTCTCTCAGCAGCCTGCCGTCTCGTTAGCGATGACAATGGAACATAAAGATCGCCCCTTGGTTAGGGTCATTCTGACTAACACTGGGAGTCATCCGGTCAAACAGCGTTCGGTGTATATCACCGCGCTGTTGGACTCTGGAGCGGACATCACTATTATTTCAGAGGAGGATTGGCCCACCGATTGGCCAGTGATGGAGGCCGCGAACCCGCAGATCCATGGGATAGGAGGGGGAATTCCCATGCGAAAATCCCGGGATATGATAGAGGTGGGGGTTATTAACCGAGACGGGTCTTTGGAGCGACCCCTGCTCCTCTTCCCCGCAGTAGCTATGGTTAGAGGGAGTATCCTAGGAAGAGATTGTCTGCAGGGCCTAGGGCTCCGCTTGACAAATTTATAGGGAGGGCCACTGTACTTACTGTTGCGCTACATCTGGCTATTCCGCTCAAATGGAAGCCAGACCACACGCCTGTGTGGATTGACCAGTGGCCCCTTCCTGAAGGTAAACTTGTAGCGCTAACGCAATTAGTGGAAAAAGAATTACAGTTAGGACATATAGAACCTTCACTTAGTTGTTGGAACACACCTGTCTTTGTGATCCGGAAGGCTTCCGGGTCTTATCGCTTATTGCATGACTTGCGCGCTGTTAACGCCAAGCTTGTTCCTTTTGGGGCCGTCCAACAGGGGGCGCCAGTTCTCTCCGCGCTCCCGCGTGGCTGGCCCCTGATGGTCCTAGACCTCAAGGATTGCTTCTTTTCTATTCCTCTTGCGGAACAAGATCGCGAAGCTTTTGCATTTACGCTCCCCTCTGTGAATAACCAGGCCCCCGCTCGAAGATTCCAATGGAAGGTCTTGCCCCAAGGGATGACCTGTTCTCCCACTATCTGTCAGTTGGTAGTGGGTCAGGTACTTGAGCCCTTGCGACTCAAGCACCCATCTCTGTGCATGTTGCATTATATGGATGATCTTTTGCTAGCCGCCTCAAGTCATGATGGGTTGGAAGCGGCAGGGGAGGAGGTTATCAGTACATTGGAAAGAGCCGGGTTCACCATTTCGCCTGATAAGATCCAGAGGGAGCCCGGAGTACAATATCTTGGGTACAAGTTAGGCAGTACGTATGTAGCACCCGTAGGCCTGGTAGCAGAACCCAGGATAGCCACCTTGTGGGATGTTCAAAAGCTGGTGGGGTCACTTCAGTGGCTTCGCCCAGCGTTAGGAATCCCGCCACGACTGATGGGCCCCTTTTATGAGCAGTTACGAGGGTCAGATCCTAACGAGGCGAGGGAATGGAATCTAGACATGAAAATGGCCTGGAGAGAGATCGTACAGCTTAGCACCACTGCTGCCTTGGAACGATGGGACCCTGCCCTGCCTCTGGAAGGAGCGGTCGCTAGATGTGAACAGGGGGCAATAGGGGTCCTGGGACAGGGACTGTCCACACACCCAAGGCCATGTTTGTGGTTATTCTCCACCCAACCCACCAAGGCGTTTACTGCTTGGTTAGAAGTGCTCACCCTTTTGATTACTAAGCTACGTGCTTCGGCAGTGCGAACCTTTGGCAAGGAGGTTGATATCCTCCTGTTGCCTGCATGCTTTCGGGAGGACCTTCCGCTCCCGGAGGGGATCCTGTTAGCCCTTAAGGGGTTTGCAGGAAAAATCAGGAGTAGTGACACGCCATCTATTTTTGACATTGCGCGTCCACTGCATGTTTCTCTGAAAGTGAGGGTTACCGACCACCCTGTACCGGGACCCACTGTCTTTACCGACGCCTCCTCAAGCACCCATAAGGGGGTGGTAGTCTGGAGGGAGGGCCCAAGGTGGGAGATAAAAGAAATAGCTGATTTGGGGGCAAGTGTACAACAACTGGAAGCACGCGCTGTGGCCATGGCACTTCTGCTGTGGCCGACAACGCCCACTAATGTAGTGACTGACTCCGCGTTTGTTGCGAAAATGTTACTCAAGATGGGACAGGAGGGAGTCCCGTCTACAGCGGCGGCTTTTATTTTAGAGGATGCGTTAAGCCAAAGGTCAGCCATGGCCGCCGTTCTCCACGTGCGGAGTCATTCTGAAGTGCCAGGGTTTTTCACAGAAGGAAATGACGTGGCAGATAGCCAAGCCACCTTTCAAGCGTATCCCTTGAGAGAGGCTAAAGATCTTCATACTGCTCTCCATATTGGACCCCGCGCGCTATCCAAAGCGTGTAATATATCTATGCAGCAGGCTAGGGAGGTTGTTCAGACCTGCCCGCATTGTAATTCAGCCCCTGCGTTGGAGGCCGGGGTAAACCCTAGGGGTTTGGGACCCCTACAGATATGGCAGACAGACTTTACGCTTGAGCCTAGAATGGCCCCCCGTTCCTGGCTCGCTGTTACTGTGGATACCGCCTCATCGGCGATAGTCGTAACTCAGCATGGCCGTGTCACATCGGTTGCTGCACAACATCATTGGGCCACGGCTATCGCCGTTTTGGGAAGACCAAAGGCCATAAAAACAGATAACGGGTCCTGCTTCACGTCTAAATCCACGCGAGAGTGGCTCGCGAGATGGGGGATAGCACACACCACCGGGATTCCGGGTAATTCCCAGGGTCAAGCTATGGTAGAGCGGGCCAACCGGCTCCTGAAAGATAAGATCCGTGTGCTTGCGGAGGGGGACGGCTTTATGAAAAGAATCCCCACCAGCAAACAGGGGGAACTACTAGCCAAGGCAATGTATGCCCTCAATCACTTTGAGCGTGGTGAAAACACAAAAACACCGATACAAAAACACTGGAGACCTACCGTTCTTACAGAAGGACCCCCGGTTAAAATACGAATAGAGACAGGGGAGTGGGAAAAAGGATGGAACGTGCTGGTCTGGGGACGAGGTTATGCCGCTGTGAAAAACAGGGACACTGATAAGGTTATTTGGGTACCCTCTCGAAAAGTTAAACCGGACATCACCCAAAAGGATGAGGTGACTAAGAAAGATGAGGCGAGCCCTCTTTTTGCAGGCATTTCTGACTGGATACCCTGGGGAGACAAGCAAGAAGGACTCCAAGGAGAAACCGCTAGCAACAAGCAAGAAAGACCCGGAGAAGACACCCTTGCTGCCAACGAGAGTTAACTATATTCTCATTATTGGTGTCCTGGTCTTGTGTGAGGTTACGGGGGTAAGAGCTGATGTTCACTTACTCGAGCAGCCAGGGAACCTTTGGATTACATGGGCCAACCGTACAGGCCAAACGGATTTCTGCCTCTCTACACAGTCAGCCACCTCCCCTTTTCAAACATGTTTGATAGGTATCCCGTCCCCTATTTCCGAAGGTGATTTTAAGGGATACGTCTCTGATAATTGCACCACTTTGGGAACTGACCGGTTAGTCTCGTCAGCCAGCATTACCGGCGGCCCTGACAACAGCACCACCCTCACTTATCGAAAGGTTTCATGCTTGCTGTTAAAGCTGAATGTCTCTATGTGGGATGAGCCACCGGAACTACAGCTGCTAGGTTCCCAGTCTCTCCCTAACATTACTAATATTACTCAGATTTCTGGTGTAACTGGGGGATGCGTAGGCTTCACCCCACACTCCAATCCAAGTGGTGTTTACGGGTGGGGCCGGAGACAGGTTACACACAACTTCTTGATCGCCCCGTGGGTCAATCCTTTCTTTAACAGCGCTTCTAACTCCACGGAACCGTTTACGGTGGTGACAGCGGATAGACACAATCTTTTTATGGGGAGTGAGTACTGCGGTGCATATGGATACAGATTTTGGGAAATATATAATTGCTCACACAGATTTGATAATTTTGATATTTACACCTGTGGAGATGTGCAGACAGTCAAATCCCCCGAAAAACAGTGTGTGGGGGGAGGAGGTATATGGGTTAATCAATCAAAGGAAATTAATGAGACAGAGCCGTTCAGTTTTACTGCGAACTGTACAGCTAGTAATTTGGGTAATGTCAGCGGATGTTGTGGAAAAACGATCACGATTCTCCCATCAGGGGCGTGGATCGACAGCACACAAGGTAGTTTCACTAAACCAAAAGCGCTACCACCCGCAATTTTCCTCATTTGTGGGGATCGCGCATGGCAAGGAATTCCCAGTCGTCCGGTAGGGGGCCCCTGCTATTTAGGCAAGCTTACCATGTTAGCACCCAACCATACAGATATTCTCAAGGTGCTTGCCAATTCATCGCGGACAGGTATAAGACGTAAACGAAGCACCTCACACCTGGATGATACATGCTCAGATGAAGTGCAGCTTTGGGGTCCTACAGCAAGAATCTTTGCATCTATCTTAGCCCCGGGGGTAGCAGCTGCGCAAGCCTTAAGAGAAATCGAGAGACTAGCCTGTTGGTCCGTTAAACAGGCTAACTTGACAACATCACTCCTCGGGGACTTATTGGATGATGTCACGAGTATTCGACACGCGGTCCTGCAGAACCGAGCGGCTATTGACTTCTTGCTTCTAGCTCACGGCCATGGCTGTGAGGACGTTGCCGGAATGTGTTGTTTCAATCTGAGTGATCACAGTGAGTCCATACAGAAGAAGTTCCAGCTAATGAAGGAACATGTCAATAAGATCGGCGTGGACAGCGACCCAATCGGAAGTTGGCTGCGAGGATTATTCGAGGGAATAGGGGAATGGGCCGTTCATTTGCTGAAAGGACTGCTTTTGGGGCTTGTAGTTATCTTGTTGCTAGTAGTGTGCCTGCCTTGCCTTTTGCAATTTGTGTCCAGTAGCATCCGAAAGATGATTAATAATTCAATCAGCTATCACGCGGAATATAAGAAGTTGCAAAAGGCTTGTAGGCAGCCCGAAAATGGAGCAGTGTAAAGCAGTACGTGGGTGGTGGTATGAAACTTGCGAATCGGGCTGTAACGGGGCAAGGCTTGACTGAGGGGACCATAGTATGTATAGGCGAAAGGCGGGGCTTCGGTTGTACGCGGTTAGGAGTCCCCTCAGGATATAGTAGTTGCGCTTTTGCATAGGGAGGGGGAAATGTAGTCAAATAGAGCCAGAGGCAACTTGAATAGTCTAAAGACCAAATAAGGAAAAAGCAAGACATTCCATATGCTCATTGGTGGCAACTAGATAAGGAAGGAATGACGCAAGGACATATGGGCGTAGACGAAGCTATGCACGATTATATAAGCTGTTGCCACCATCAAATAAACGCCATTTTACCATTCACCACATTGGTGTGCACCTGGGTAGATGGACAGACCGTTGAGTCCCTAACGATTGCGAACACCTGAATGAAGCTGAAGGCTTCACTGTAG
